# Supplementary material for: A neural network model of hippocampal contributions to category learning
Source: eLife. 2023 Dec 11;12:e77185. doi: 10.7554/eLife.77185 (PMC10712951; doi:10.7554/eLife.77185)
Supplement: Figure 3—source data 1. [file elife-77185-fig3-data1.csv]

condition	trial	accuracy	standard_error	test_type
Intact	0	0.4075	0.013077029	cat
Intact	10	0.425833333	0.012915105	cat
Intact	20	0.475	0.013321754	cat
Intact	30	0.543333333	0.015144274	cat
Intact	40	0.569166667	0.013085609	cat
Intact	50	0.595833333	0.01403334	cat
Intact	60	0.6375	0.013420119	cat
Intact	70	0.674166667	0.011909156	cat
Intact	80	0.691666667	0.011267834	cat
Intact	90	0.700833333	0.012371392	cat
Intact	100	0.725833333	0.012882476	cat
Intact	110	0.748333333	0.012308009	cat
Intact	120	0.771666667	0.011460418	cat
Intact	130	0.784166667	0.011180026	cat
Intact	140	0.7875	0.010944137	cat
MSP only	0	0.3825	0.014069283	cat
MSP only	10	0.410833333	0.013672814	cat
MSP only	20	0.439166667	0.012243725	cat
MSP only	30	0.523333333	0.012761298	cat
MSP only	40	0.644166667	0.013754654	cat
MSP only	50	0.736666667	0.013849439	cat
MSP only	60	0.818333333	0.012667508	cat
MSP only	70	0.888333333	0.011061759	cat
MSP only	80	0.941666667	0.007811974	cat
MSP only	90	0.976666667	0.004116704	cat
MSP only	100	0.990833333	0.00262055	cat
MSP only	110	0.998333333	0.001172544	cat
MSP only	120	1	0	cat
MSP only	130	1	0	cat
MSP only	140	1	0	cat
TSP only	0	0.359848485	0.011240533	cat
TSP only	10	0.403787879	0.012562973	cat
TSP only	20	0.458333333	0.013685378	cat
TSP only	30	0.5125	0.014427681	cat
TSP only	40	0.541666667	0.014188684	cat
TSP only	50	0.555	0.013568011	cat
TSP only	60	0.590833333	0.012871581	cat
TSP only	70	0.6025	0.014450999	cat
TSP only	80	0.6225	0.014767892	cat
TSP only	90	0.641666667	0.014385076	cat
TSP only	100	0.6525	0.013866396	cat
TSP only	110	0.678712121	0.013488938	cat
TSP only	120	0.688787879	0.013890633	cat
TSP only	130	0.710454545	0.01336133	cat
TSP only	140	0.712121212	0.013145874	cat
Intact	0	0.393333333	0.012427116	gen
Intact	10	0.475833333	0.011802659	gen
Intact	20	0.549166667	0.013457701	gen
Intact	30	0.630833333	0.013724021	gen
Intact	40	0.7025	0.012825723	gen
Intact	50	0.7525	0.012220787	gen
Intact	60	0.7925	0.011635058	gen
Intact	70	0.815	0.012054636	gen
Intact	80	0.8525	0.009756793	gen
Intact	90	0.87	0.009350393	gen
Intact	100	0.885833333	0.009597322	gen
Intact	110	0.900833333	0.008433323	gen
Intact	120	0.9175	0.007811525	gen
Intact	130	0.930833333	0.006809806	gen
Intact	140	0.9375	0.006944444	gen
MSP only	0	0.365530303	0.011829486	gen
MSP only	10	0.451666667	0.014754824	gen
MSP only	20	0.6025	0.017681835	gen
MSP only	30	0.735833333	0.017689768	gen
MSP only	40	0.853333333	0.015220047	gen
MSP only	50	0.925	0.013216024	gen
MSP only	60	0.96	0.010222003	gen
MSP only	70	0.985	0.006420104	gen
MSP only	80	0.996666667	0.002627234	gen
MSP only	90	1	0	gen
MSP only	100	1	0	gen
MSP only	110	1	0	gen
MSP only	120	1	0	gen
MSP only	130	1	0	gen
MSP only	140	1	0	gen
TSP only	0	0.371666667	0.013264765	gen
TSP only	10	0.4375	0.012216195	gen
TSP only	20	0.458333333	0.013478794	gen
TSP only	30	0.499621212	0.012459121	gen
TSP only	40	0.526666667	0.013602089	gen
TSP only	50	0.5375	0.014668761	gen
TSP only	60	0.544772727	0.014544424	gen
TSP only	70	0.548787879	0.014015129	gen
TSP only	80	0.552954545	0.012727097	gen
TSP only	90	0.543787879	0.014667261	gen
TSP only	100	0.535378788	0.013537827	gen
TSP only	110	0.537878788	0.01464211	gen
TSP only	120	0.532121212	0.014492926	gen
TSP only	130	0.538712121	0.01390699	gen
TSP only	140	0.533787879	0.015575794	gen
Intact	0	0.240538257	0.008355679	unique
Intact	10	0.265337153	0.009519851	unique
Intact	20	0.280850083	0.01016705	unique
Intact	30	0.291845802	0.010096271	unique
Intact	40	0.318704737	0.010051104	unique
Intact	50	0.344345192	0.009762493	unique
Intact	60	0.347492884	0.009691212	unique
Intact	70	0.364106094	0.009783762	unique
Intact	80	0.393956222	0.00999212	unique
Intact	90	0.419055176	0.010771793	unique
Intact	100	0.443279374	0.010432577	unique
Intact	110	0.451134349	0.010066253	unique
Intact	120	0.460871863	0.011185346	unique
Intact	130	0.480892545	0.012022268	unique
Intact	140	0.512795325	0.01107216	unique
MSP only	0	0.253478284	0.009252647	unique
MSP only	10	0.254548721	0.00743334	unique
MSP only	20	0.254971875	0.007549127	unique
MSP only	30	0.26143158	0.006924051	unique
MSP only	40	0.267107942	0.006721672	unique
MSP only	50	0.274266258	0.006917868	unique
MSP only	60	0.269862206	0.00658776	unique
MSP only	70	0.266843674	0.004781275	unique
MSP only	80	0.257135572	0.003523543	unique
MSP only	90	0.251615218	0.002657742	unique
MSP only	100	0.256659958	0.001996055	unique
MSP only	110	0.2550056	0.002460972	unique
MSP only	120	0.260096735	0.003169386	unique
MSP only	130	0.260803245	0.003351447	unique
MSP only	140	0.263254329	0.003203075	unique
TSP only	0	0.253382728	0.009847279	unique
TSP only	10	0.294446727	0.010459037	unique
TSP only	20	0.294178447	0.010951666	unique
TSP only	30	0.323338252	0.010414874	unique
TSP only	40	0.342461415	0.011959661	unique
TSP only	50	0.359867435	0.011883471	unique
TSP only	60	0.391862041	0.011597174	unique
TSP only	70	0.413869871	0.012526419	unique
TSP only	80	0.439163658	0.012915546	unique
TSP only	90	0.461245713	0.013224225	unique
TSP only	100	0.466662847	0.012705814	unique
TSP only	110	0.506816349	0.013749143	unique
TSP only	120	0.521042339	0.014761168	unique
TSP only	130	0.531288796	0.015059368	unique
TSP only	140	0.549554326	0.014602911	unique
Humans	16	0.657142857	0.081404242	cat
Humans	32	0.62962963	0.094705243	cat
Humans	48	0.578947368	0.081168379	cat
Humans	64	0.818181818	0.058817876	cat
Humans	80	0.72972973	0.074016562	cat
Humans	96	0.771428571	0.072014404	cat
Humans	112	0.714285714	0.101015254	cat
Humans	128	0.722222222	0.108632485	cat
Humans	16	0.257403189	0.014763309	unique
Humans	32	0.375603865	0.016840011	unique
Humans	48	0.375709421	0.016325936	unique
Humans	64	0.459096459	0.017423493	unique
Humans	80	0.469470828	0.018395857	unique
Humans	96	0.474137931	0.018940693	unique
Humans	112	0.533213645	0.021157888	unique
Humans	128	0.580340265	0.021476972	unique
