# Supplementary material for: A neural network model of hippocampal contributions to category learning
Source: eLife. 2023 Dec 11;12:e77185. doi: 10.7554/eLife.77185 (PMC10712951; doi:10.7554/eLife.77185)
Supplement: Figure 3—source data 2. [file elife-77185-fig3-data2.xlsx]

## Sheet: DG_MeanCorMatrix_test_init
item	c1s2	c1s3	c1s4	c1s5	c2s2	c2s3	c2s4	c2s5	c3s2	c3s3	c3s4	c3s5
c1s2	1	0.0103644	0.0125184	0.00392378	-0.00174305	-0.00593097	-0.00635479	-0.00723455	-0.0112936	-0.00890487	-0.00825261	-0.0098672
c1s3	0.0103644	1	0.0156111	0.00148477	-0.00819042	-0.00920649	-0.00480506	-0.00299501	-0.0126879	-0.0100052	-0.00857001	-0.00932092
c1s4	0.0125184	0.0156111	1	0.0129162	-0.0103144	-0.0086456	-0.00431579	-0.00561975	-0.00593868	-0.0116426	-0.00234733	-0.0102041
c1s5	0.00392378	0.00148477	0.0129162	1	-0.00689117	-0.00557453	-0.0095642	-0.00808593	-0.0122935	-0.00656458	-0.0100742	-0.00437124
c2s2	-0.00174305	-0.00819042	-0.0103144	-0.00689117	1	0.0188183	0.0162139	0.000120053	-0.00853728	-0.00577495	-0.00393682	-0.00902999
c2s3	-0.00593097	-0.00920649	-0.0086456	-0.00557453	0.0188183	1	0.0124287	0.00833927	-0.00887253	-0.0108634	-0.00740499	-0.0074038
c2s4	-0.00635479	-0.00480506	-0.00431579	-0.0095642	0.0162139	0.0124287	1	-0.00118107	-0.00759006	-0.0100966	-0.0116053	-0.00908099
c2s5	-0.00723455	-0.00299501	-0.00561975	-0.00808593	0.000120053	0.00833927	-0.00118107	1	-0.00458562	-0.00974649	-0.00947508	-0.00710837
c3s2	-0.0112936	-0.0126879	-0.00593868	-0.0122935	-0.00853728	-0.00887253	-0.00759006	-0.00458562	1	-0.00299718	0.0114625	0.00458964
c3s3	-0.00890487	-0.0100052	-0.0116426	-0.00656458	-0.00577495	-0.0108634	-0.0100966	-0.00974649	-0.00299718	1	0.0100817	0.0285978
c3s4	-0.00825261	-0.00857001	-0.00234733	-0.0100742	-0.00393682	-0.00740499	-0.0116053	-0.00947508	0.0114625	0.0100817	1	0.0060322
c3s5	-0.0098672	-0.00932092	-0.0102041	-0.00437124	-0.00902999	-0.0074038	-0.00908099	-0.00710837	0.00458964	0.0285978	0.0060322	1

## Sheet: DG_MeanCorMatrix_test_set
item	c1s2	c1s3	c1s4	c1s5	c2s2	c2s3	c2s4	c2s5	c3s2	c3s3	c3s4	c3s5
c1s2	1	0.287587	0.268042	0.319736	0.0472783	0.0546901	0.0715371	0.121978	0.141834	0.111706	0.16409	0.146562
c1s3	0.287587	1	0.2802	0.26229	0.0945528	0.0796236	0.0711124	0.0966053	0.0869464	0.110493	0.125742	0.0947422
c1s4	0.268042	0.2802	1	0.23479	0.121566	0.116775	0.111564	0.150019	0.103188	0.105681	0.102209	0.0733154
c1s5	0.319736	0.26229	0.23479	1	0.0793107	0.0857135	0.112184	0.1241	0.0886869	0.12941	0.113728	0.119644
c2s2	0.0472783	0.0945528	0.121566	0.0793107	1	0.28923	0.254596	0.313094	0.0880031	0.134484	0.11804	0.0745955
c2s3	0.0546901	0.0796236	0.116775	0.0857135	0.28923	1	0.278605	0.269547	0.107864	0.107402	0.103092	0.0370398
c2s4	0.0715371	0.0711124	0.111564	0.112184	0.254596	0.278605	1	0.295558	0.109012	0.108823	0.098607	0.109319
c2s5	0.121978	0.0966053	0.150019	0.1241	0.313094	0.269547	0.295558	1	0.0809928	0.10386	0.0698713	0.0825745
c3s2	0.141834	0.0869464	0.103188	0.0886869	0.0880031	0.107864	0.109012	0.0809928	1	0.23611	0.293012	0.28257
c3s3	0.111706	0.110493	0.105681	0.12941	0.134484	0.107402	0.108823	0.10386	0.23611	1	0.246111	0.265949
c3s4	0.16409	0.125742	0.102209	0.113728	0.11804	0.103092	0.098607	0.0698713	0.293012	0.246111	1	0.297342
c3s5	0.146562	0.0947422	0.0733154	0.119644	0.0745955	0.0370398	0.109319	0.0825745	0.28257	0.265949	0.297342	1

## Sheet: CA3_MeanCorMatrix_test_init
item	c1s2	c1s3	c1s4	c1s5	c2s2	c2s3	c2s4	c2s5	c3s2	c3s3	c3s4	c3s5
c1s2	1	0.00627159	0.00663793	0.0112229	-0.00625102	0.0166575	-0.0110538	-0.0266208	-0.000163643	-0.0103169	-0.00193648	-0.00410067
c1s3	0.00627159	1	0.0330807	-0.0150484	0.00515229	-0.0168085	0.00701138	-0.0181816	0.019045	0.00386603	-0.0158739	0.0021763
c1s4	0.00663793	0.0330807	1	-0.00498226	-0.0106601	-0.0140596	-0.00243086	-0.0181138	-0.00422807	-0.0164696	-0.0318276	-0.00469365
c1s5	0.0112229	-0.0150484	-0.00498226	1	-0.0108982	-0.00373471	-0.0344558	-0.00770846	-0.014153	-0.00930477	-0.0104047	-0.0180025
c2s2	-0.00625102	0.00515229	-0.0106601	-0.0108982	1	0.0186201	0.0351551	0.0107182	-0.0135762	-0.00780621	0.00332629	-0.0248678
c2s3	0.0166575	-0.0168085	-0.0140596	-0.00373471	0.0186201	1	0.0248964	0.00419571	-0.0203801	0.0120983	-0.0182746	-0.0139882
c2s4	-0.0110538	0.00701138	-0.00243086	-0.0344558	0.0351551	0.0248964	1	0.0114642	-0.0182635	-0.0271788	-0.0268089	-0.0257554
c2s5	-0.0266208	-0.0181816	-0.0181138	-0.00770846	0.0107182	0.00419571	0.0114642	1	-0.000311908	-0.0170202	-0.01727	-0.0163043
c3s2	-0.000163643	0.019045	-0.00422807	-0.014153	-0.0135762	-0.0203801	-0.0182635	-0.000311908	1	-0.0202085	0.0155135	-0.000576737
c3s3	-0.0103169	0.00386603	-0.0164696	-0.00930477	-0.00780621	0.0120983	-0.0271788	-0.0170202	-0.0202085	1	0.0101435	0.0260779
c3s4	-0.00193648	-0.0158739	-0.0318276	-0.0104047	0.00332629	-0.0182746	-0.0268089	-0.01727	0.0155135	0.0101435	1	-0.0106724
c3s5	-0.00410067	0.0021763	-0.00469365	-0.0180025	-0.0248678	-0.0139882	-0.0257554	-0.0163043	-0.000576737	0.0260779	-0.0106724	1

## Sheet: CA3_MeanCorMatrix_test_set
item	c1s2	c1s3	c1s4	c1s5	c2s2	c2s3	c2s4	c2s5	c3s2	c3s3	c3s4	c3s5
c1s2	1	0.199391	0.175636	0.275613	0.00486371	-0.000174161	0.0151854	0.083819	0.0780494	0.0285839	0.104385	0.0995082
c1s3	0.199391	1	0.197708	0.183335	0.0377425	0.00987238	5.97118e-05	0.0434715	0.0383339	0.0365253	0.0744098	0.0461049
c1s4	0.175636	0.197708	1	0.175929	0.0554244	0.0447781	0.0147014	0.0850792	0.0343185	0.047538	0.037535	-0.00129323
c1s5	0.275613	0.183335	0.175929	1	0.0159315	0.0327589	0.0389574	0.067303	0.0151702	0.0699142	0.0681581	0.0763378
c2s2	0.00486371	0.0377425	0.0554244	0.0159315	1	0.20509	0.164466	0.28374	0.0244302	0.0747845	0.0607239	-0.00945559
c2s3	-0.000174161	0.00987238	0.0447781	0.0327589	0.20509	1	0.192758	0.172677	0.0376637	0.0450422	0.0361187	-0.0335551
c2s4	0.0151854	5.97118e-05	0.0147014	0.0389574	0.164466	0.192758	1	0.186558	0.0498993	0.00731563	0.0186993	0.0345784
c2s5	0.083819	0.0434715	0.0850792	0.067303	0.28374	0.172677	0.186558	1	0.0225238	0.0412375	-0.0058681	0.0162279
c3s2	0.0780494	0.0383339	0.0343185	0.0151702	0.0244302	0.0376637	0.0498993	0.0225238	1	0.138616	0.181416	0.178397
c3s3	0.0285839	0.0365253	0.047538	0.0699142	0.0747845	0.0450422	0.00731563	0.0412375	0.138616	1	0.149882	0.166843
c3s4	0.104385	0.0744098	0.037535	0.0681581	0.0607239	0.0361187	0.0186993	-0.0058681	0.181416	0.149882	1	0.220052
c3s5	0.0995082	0.0461049	-0.00129323	0.0763378	-0.00945559	-0.0335551	0.0345784	0.0162279	0.178397	0.166843	0.220052	1

## Sheet: CA1_MeanCorMatrix_test_init
item	c1s2	c1s3	c1s4	c1s5	c2s2	c2s3	c2s4	c2s5	c3s2	c3s3	c3s4	c3s5
c1s2	1	0.132407	0.116084	0.122502	0.00195884	0.00296384	0.00916335	-0.0122668	0.0296825	0.0114391	0.0207515	0.0116156
c1s3	0.132407	1	0.130692	0.128631	0.0137068	-0.000361314	0.000801801	0.000281308	0.0161945	0.00175063	0.00116718	0.0149538
c1s4	0.116084	0.130692	1	0.0986851	0.0113305	-0.00230485	-0.0048838	-0.00413207	0.0109718	0.00507015	-0.00490734	-0.00373325
c1s5	0.122502	0.128631	0.0986851	1	0.00959417	0.0147026	-0.00162276	-0.00629625	0.0396137	0.0141888	0.00827033	4.61289e-05
c2s2	0.00195884	0.0137068	0.0113305	0.00959417	1	0.14436	0.130999	0.149099	0.0116689	0.0174717	0.00252832	0.00121644
c2s3	0.00296384	-0.000361314	-0.00230485	0.0147026	0.14436	1	0.137287	0.127021	0.006933	0.0151286	-0.00928408	-0.00761027
c2s4	0.00916335	0.000801801	-0.0048838	-0.00162276	0.130999	0.137287	1	0.134519	-0.0065142	-0.000324759	-0.0228452	-0.0125813
c2s5	-0.0122668	0.000281308	-0.00413207	-0.00629625	0.149099	0.127021	0.134519	1	0.00912397	0.00621059	0.0129663	0.0159066
c3s2	0.0296825	0.0161945	0.0109718	0.0396137	0.0116689	0.006933	-0.0065142	0.00912397	1	0.108963	0.139697	0.118289
c3s3	0.0114391	0.00175063	0.00507015	0.0141888	0.0174717	0.0151286	-0.000324759	0.00621059	0.108963	1	0.107515	0.114136
c3s4	0.0207515	0.00116718	-0.00490734	0.00827033	0.00252832	-0.00928408	-0.0228452	0.0129663	0.139697	0.107515	1	0.143389
c3s5	0.0116156	0.0149538	-0.00373325	4.61289e-05	0.00121644	-0.00761027	-0.0125813	0.0159066	0.118289	0.114136	0.143389	1

## Sheet: CA1_MeanCorMatrix_test_set
item	c1s2	c1s3	c1s4	c1s5	c2s2	c2s3	c2s4	c2s5	c3s2	c3s3	c3s4	c3s5
c1s2	1	0.493451	0.426088	0.542378	0.0616787	0.0659644	0.10818	0.143767	0.193557	0.177428	0.216917	0.180058
c1s3	0.493451	1	0.432864	0.519282	0.129133	0.115486	0.102604	0.1214	0.144286	0.165595	0.19976	0.151906
c1s4	0.426088	0.432864	1	0.44467	0.15873	0.133361	0.123336	0.15551	0.134878	0.161892	0.120537	0.0972794
c1s5	0.542378	0.519282	0.44467	1	0.11549	0.117438	0.14266	0.154311	0.119406	0.177023	0.168841	0.145206
c2s2	0.0616787	0.129133	0.15873	0.11549	1	0.4962	0.466697	0.509577	0.123349	0.180179	0.139134	0.115145
c2s3	0.0659644	0.115486	0.133361	0.117438	0.4962	1	0.494659	0.497169	0.12339	0.154868	0.113117	0.0446047
c2s4	0.10818	0.102604	0.123336	0.14266	0.466697	0.494659	1	0.477685	0.150783	0.152688	0.128309	0.11222
c2s5	0.143767	0.1214	0.15551	0.154311	0.509577	0.497169	0.477685	1	0.109316	0.15386	0.091482	0.0760028
c3s2	0.193557	0.144286	0.134878	0.119406	0.123349	0.12339	0.150783	0.109316	1	0.423838	0.484905	0.499459
c3s3	0.177428	0.165595	0.161892	0.177023	0.180179	0.154868	0.152688	0.15386	0.423838	1	0.434983	0.436323
c3s4	0.216917	0.19976	0.120537	0.168841	0.139134	0.113117	0.128309	0.091482	0.484905	0.434983	1	0.530229
c3s5	0.180058	0.151906	0.0972794	0.145206	0.115145	0.0446047	0.11222	0.0760028	0.499459	0.436323	0.530229	1
