# Supplementary material for: A neural network model of hippocampal contributions to category learning
Source: eLife. 2023 Dec 11;12:e77185. doi: 10.7554/eLife.77185 (PMC10712951; doi:10.7554/eLife.77185)
Supplement: Figure 4—source data 1. [file elife-77185-fig4-data1.csv]

condition	trial	accuracy	N	standard_error	test_type
Intact	0	0.5073333	214	0.006010938	cat
Intact	10	0.6008333	214	0.006262263	cat
Intact	20	0.6311667	210	0.006189193	cat
Intact	30	0.6481689	191	0.006895805	cat
Intact	40	0.6582825	140	0.007564068	cat
Intact	50	0.6716524	100	0.008923378	cat
MSP only	0	0.5104167	138	0.010110665	cat
MSP only	10	0.5866667	138	0.009739774	cat
MSP only	20	0.6425	135	0.010918043	cat
MSP only	30	0.6900353	130	0.011647473	cat
MSP only	40	0.6972693	122	0.012103234	cat
MSP only	50	0.6867816	100	0.013056367	cat
TSP only	0	0.5006667	370	0.006448432	cat
TSP only	10	0.54	370	0.00671658	cat
TSP only	20	0.5478333	370	0.006657187	cat
TSP only	30	0.5387267	304	0.007079707	cat
TSP only	40	0.5370748	181	0.009249728	cat
TSP only	50	0.5265432	100	0.012287499	cat
Intact	0	0.4305	214	0.005910766	rec
Intact	10	0.6618333	214	0.006558317	rec
Intact	20	0.7183333	210	0.006597419	rec
Intact	30	0.7408445	191	0.006083247	rec
Intact	40	0.7586382	140	0.006772834	rec
Intact	50	0.7863248	100	0.007749817	rec
MSP only	0	0.4458333	138	0.009738162	rec
MSP only	10	0.5683333	138	0.010792184	rec
MSP only	20	0.6058333	135	0.010379288	rec
MSP only	30	0.6261023	130	0.010821836	rec
MSP only	40	0.6384181	122	0.010383561	rec
MSP only	50	0.6316092	100	0.011696418	rec
TSP only	0	0.4401667	370	0.006364298	rec
TSP only	10	0.6615	370	0.006725438	rec
TSP only	20	0.7238333	370	0.006668549	rec
TSP only	30	0.7562855	304	0.006807958	rec
TSP only	40	0.7602041	181	0.00891605	rec
TSP only	50	0.782716	100	0.010590929	rec
