# Supplementary material for: A neural network model of hippocampal contributions to category learning
Source: eLife. 2023 Dec 11;12:e77185. doi: 10.7554/eLife.77185 (PMC10712951; doi:10.7554/eLife.77185)
Supplement: Figure 4—source data 2. [file elife-77185-fig4-data2.xlsx]

## Sheet: DG_MeanCorMatrix_test_init
item	pat_3	pat_1	pat_5	pat_7	pat_2	pat_11	pat_13	pat_4	pat_14	pat_10	pat_8	pat_12
pat_3	1	0.151078	0.0381016	0.354294	0.167503	0.461703	0.00389776	-0.00938483	0.0024495	0.0344066	-0.0104488	-0.00987629
pat_1	0.151078	1	0.133463	0.12386	-0.00403464	0.127802	0.111337	-0.00818103	-0.0128058	-0.00885953	-0.00848453	-0.0108916
pat_5	0.0381016	0.133463	1	0.356934	-0.00138515	0.0110335	0.388719	0.135234	0.00206092	-0.00948411	-0.0132462	0.0315242
pat_7	0.354294	0.12386	0.356934	1	0.173823	0.189568	0.156979	0.149324	0.168508	0.0203209	-0.0122922	0.0154687
pat_2	0.167503	-0.00403464	-0.00138515	0.173823	1	0.164004	-0.0140435	0.00121219	0.13792	0.170697	-0.00957639	-0.0140921
pat_11	0.461703	0.127802	0.0110335	0.189568	0.164004	1	0.122142	-0.0146768	0.135816	0.360021	0.0811539	-0.00121253
pat_13	0.00389776	0.111337	0.388719	0.156979	-0.0140435	0.122142	1	0.158392	0.188253	0.000590363	0.120936	0.38408
pat_4	-0.00938483	-0.00818103	0.135234	0.149324	0.00121219	-0.0146768	0.158392	1	0.184085	-0.005623	0.0051875	0.198755
pat_14	0.0024495	-0.0128058	0.00206092	0.168508	0.13792	0.135816	0.188253	0.184085	1	0.388343	0.126587	0.388135
pat_10	0.0344066	-0.00885953	-0.00948411	0.0203209	0.170697	0.360021	0.000590363	-0.005623	0.388343	1	0.0954781	0.0390403
pat_8	-0.0104488	-0.00848453	-0.0132462	-0.0122922	-0.00957639	0.0811539	0.120936	0.0051875	0.126587	0.0954781	1	0.136724
pat_12	-0.00987629	-0.0108916	0.0315242	0.0154687	-0.0140921	-0.00121253	0.38408	0.198755	0.388135	0.0390403	0.136724	1

## Sheet: DG_MeanCorMatrix_test_set
item	pat_3	pat_1	pat_5	pat_7	pat_2	pat_11	pat_13	pat_4	pat_14	pat_10	pat_8	pat_12
pat_3	1	0.257862	0.129647	0.398021	0.222642	0.306613	0.0930915	0.0480898	0.0879657	0.145602	0.000637688	0.00889118
pat_1	0.257862	1	0.22107	0.171912	0.0422826	0.181535	0.197761	0.0167914	0.00579701	0.0245271	0.00954551	0.0151015
pat_5	0.129647	0.22107	1	0.333608	0.00189166	0.0855336	0.342376	0.211205	0.0745079	0.0117086	0.0269087	0.150461
pat_7	0.398021	0.171912	0.333608	1	0.154687	0.250337	0.15869	0.172175	0.181995	0.0937644	0.0129167	0.0656593
pat_2	0.222642	0.0422826	0.00189166	0.154687	1	0.119943	0.0139253	-0.00764826	0.144175	0.19232	0.0220963	0.00869079
pat_11	0.306613	0.181535	0.0855336	0.250337	0.119943	1	0.18352	0.0416727	0.223544	0.285345	0.155279	0.112474
pat_13	0.0930915	0.197761	0.342376	0.15869	0.0139253	0.18352	1	0.110387	0.22817	0.13615	0.165907	0.254047
pat_4	0.0480898	0.0167914	0.211205	0.172175	-0.00764826	0.0416727	0.110387	1	0.138987	0.0239465	0.0386236	0.152321
pat_14	0.0879657	0.00579701	0.0745079	0.181995	0.144175	0.223544	0.22817	0.138987	1	0.371184	0.176034	0.373066
pat_10	0.145602	0.0245271	0.0117086	0.0937644	0.19232	0.285345	0.13615	0.0239465	0.371184	1	0.192643	0.163802
pat_8	0.000637688	0.00954551	0.0269087	0.0129167	0.0220963	0.155279	0.165907	0.0386236	0.176034	0.192643	1	0.271218
pat_12	0.00889118	0.0151015	0.150461	0.0656593	0.00869079	0.112474	0.254047	0.152321	0.373066	0.163802	0.271218	1

## Sheet: CA3_MeanCorMatrix_test_init
item	pat_3	pat_1	pat_5	pat_7	pat_2	pat_11	pat_13	pat_4	pat_14	pat_10	pat_8	pat_12
pat_3	1	0.0519274	0.0171973	0.271713	0.066806	0.354856	-0.0125784	0.0169108	-0.026752	0.00172419	0.0173552	-0.0137478
pat_1	0.0519274	1	0.0351877	0.0338898	-0.028538	0.0552728	0.0403213	0.0160651	-0.0236431	-0.0172338	-0.00443408	-0.00176026
pat_5	0.0171973	0.0351877	1	0.230803	0.0122861	0.0255737	0.281129	0.0839792	0.00964295	0.0115221	-0.00827685	0.0427471
pat_7	0.271713	0.0338898	0.230803	1	0.108387	0.139991	0.081155	0.105083	0.105057	0.0265963	-0.0159834	-0.00462747
pat_2	0.066806	-0.028538	0.0122861	0.108387	1	0.116503	0.0212766	-0.00238569	0.0858176	0.0881704	0.0100512	-0.0274455
pat_11	0.354856	0.0552728	0.0255737	0.139991	0.116503	1	0.0580121	0.0149567	0.0617835	0.231463	0.0351124	0.0152991
pat_13	-0.0125784	0.0403213	0.281129	0.081155	0.0212766	0.0580121	1	0.0791429	0.142897	0.0132235	0.0673435	0.298722
pat_4	0.0169108	0.0160651	0.0839792	0.105083	-0.00238569	0.0149567	0.0791429	1	0.0555563	-0.0076645	-0.00385316	0.103884
pat_14	-0.026752	-0.0236431	0.00964295	0.105057	0.0858176	0.0617835	0.142897	0.0555563	1	0.339634	0.0687202	0.306273
pat_10	0.00172419	-0.0172338	0.0115221	0.0265963	0.0881704	0.231463	0.0132235	-0.0076645	0.339634	1	0.0400655	0.0857516
pat_8	0.0173552	-0.00443408	-0.00827685	-0.0159834	0.0100512	0.0351124	0.0673435	-0.00385316	0.0687202	0.0400655	1	0.0339918
pat_12	-0.0137478	-0.00176026	0.0427471	-0.00462747	-0.0274455	0.0152991	0.298722	0.103884	0.306273	0.0857516	0.0339918	1

## Sheet: CA3_MeanCorMatrix_test_set
item	pat_3	pat_1	pat_5	pat_7	pat_2	pat_11	pat_13	pat_4	pat_14	pat_10	pat_8	pat_12
pat_3	1	0.245694	0.0788844	0.295493	0.203687	0.248709	0.0665168	0.0306623	0.0256358	0.127328	-0.0232925	-0.0402985
pat_1	0.245694	1	0.177333	0.144236	0.012342	0.207473	0.161811	0.0297396	-0.00695337	0.0206602	0.001665	0.00174635
pat_5	0.0788844	0.177333	1	0.288119	-0.0147575	0.0632527	0.284173	0.237252	0.0380188	-0.00189309	0.0368479	0.10354
pat_7	0.295493	0.144236	0.288119	1	0.109324	0.201649	0.101387	0.170307	0.121904	0.0569512	0.0234284	0.00566454
pat_2	0.203687	0.012342	-0.0147575	0.109324	1	0.0710697	0.0138712	-0.0215855	0.085675	0.158825	-0.00660786	-0.00126661
pat_11	0.248709	0.207473	0.0632527	0.201649	0.0710697	1	0.178533	0.0337656	0.182774	0.25476	0.114141	0.0580487
pat_13	0.0665168	0.161811	0.284173	0.101387	0.0138712	0.178533	1	0.0533096	0.160129	0.0773349	0.142363	0.182863
pat_4	0.0306623	0.0297396	0.237252	0.170307	-0.0215855	0.0337656	0.0533096	1	0.100688	0.0141808	0.0336382	0.113787
pat_14	0.0256358	-0.00695337	0.0380188	0.121904	0.085675	0.182774	0.160129	0.100688	1	0.312876	0.108033	0.336587
pat_10	0.127328	0.0206602	-0.00189309	0.0569512	0.158825	0.25476	0.0773349	0.0141808	0.312876	1	0.150434	0.124765
pat_8	-0.0232925	0.001665	0.0368479	0.0234284	-0.00660786	0.114141	0.142363	0.0336382	0.108033	0.150434	1	0.199335
pat_12	-0.0402985	0.00174635	0.10354	0.00566454	-0.00126661	0.0580487	0.182863	0.113787	0.336587	0.124765	0.199335	1

## Sheet: CA1_MeanCorMatrix_test_init
item	pat_3	pat_1	pat_5	pat_7	pat_2	pat_11	pat_13	pat_4	pat_14	pat_10	pat_8	pat_12
pat_3	1	0.375013	0.336521	0.560725	0.381719	0.58671	0.304971	0.101737	0.293441	0.293785	0.106699	0.0974551
pat_1	0.375013	1	0.411433	0.316767	0.0955281	0.342037	0.354411	0.115111	0.110951	0.0887362	0.0823302	0.096521
pat_5	0.336521	0.411433	1	0.561329	0.0947132	0.305474	0.551794	0.375051	0.281567	0.103264	0.105543	0.281002
pat_7	0.560725	0.316767	0.561329	1	0.366202	0.471592	0.452979	0.35036	0.465953	0.272975	0.115825	0.264377
pat_2	0.381719	0.0955281	0.0947132	0.366202	1	0.337387	0.116739	0.122215	0.356344	0.360836	0.11728	0.0825384
pat_11	0.58671	0.342037	0.305474	0.471592	0.337387	1	0.474216	0.122344	0.468354	0.534988	0.33301	0.275948
pat_13	0.304971	0.354411	0.551794	0.452979	0.116739	0.474216	1	0.33803	0.485137	0.302153	0.382162	0.569902
pat_4	0.101737	0.115111	0.375051	0.35036	0.122215	0.122344	0.33803	1	0.343328	0.119532	0.115785	0.386339
pat_14	0.293441	0.110951	0.281567	0.465953	0.356344	0.468354	0.485137	0.343328	1	0.599467	0.380479	0.57214
pat_10	0.293785	0.0887362	0.103264	0.272975	0.360836	0.534988	0.302153	0.119532	0.599467	1	0.392951	0.329821
pat_8	0.106699	0.0823302	0.105543	0.115825	0.11728	0.33301	0.382162	0.115785	0.380479	0.392951	1	0.398357
pat_12	0.0974551	0.096521	0.281002	0.264377	0.0825384	0.275948	0.569902	0.386339	0.57214	0.329821	0.398357	1

## Sheet: CA1_MeanCorMatrix_test_set
item	pat_3	pat_1	pat_5	pat_7	pat_2	pat_11	pat_13	pat_4	pat_14	pat_10	pat_8	pat_12
pat_3	1	0.529031	0.450667	0.622865	0.466106	0.54455	0.446125	0.238267	0.379924	0.389646	0.222909	0.258802
pat_1	0.529031	1	0.445913	0.438607	0.330954	0.434821	0.450195	0.21872	0.32132	0.304214	0.23404	0.269869
pat_5	0.450667	0.445913	1	0.62774	0.248528	0.414975	0.575945	0.432697	0.378027	0.269803	0.235138	0.378534
pat_7	0.622865	0.438607	0.62774	1	0.399618	0.571489	0.534863	0.392138	0.520744	0.428824	0.289013	0.41363
pat_2	0.466106	0.330954	0.248528	0.399618	1	0.436074	0.380727	0.228916	0.4285	0.426484	0.241457	0.258757
pat_11	0.54455	0.434821	0.414975	0.571489	0.436074	1	0.567009	0.343868	0.614892	0.609559	0.40128	0.417703
pat_13	0.446125	0.450195	0.575945	0.534863	0.380727	0.567009	1	0.373106	0.580794	0.43951	0.393329	0.517306
pat_4	0.238267	0.21872	0.432697	0.392138	0.228916	0.343868	0.373106	1	0.452574	0.333042	0.305384	0.400429
pat_14	0.379924	0.32132	0.378027	0.520744	0.4285	0.614892	0.580794	0.452574	1	0.642721	0.447764	0.613311
pat_10	0.389646	0.304214	0.269803	0.428824	0.426484	0.609559	0.43951	0.333042	0.642721	1	0.418935	0.430192
pat_8	0.222909	0.23404	0.235138	0.289013	0.241457	0.40128	0.393329	0.305384	0.447764	0.418935	1	0.53221
pat_12	0.258802	0.269869	0.378534	0.41363	0.258757	0.417703	0.517306	0.400429	0.613311	0.430192	0.53221	1
