# Supplementary material for: A neural network model of hippocampal contributions to category learning
Source: eLife. 2023 Dec 11;12:e77185. doi: 10.7554/eLife.77185 (PMC10712951; doi:10.7554/eLife.77185)
Supplement: Figure 5—source data 2. [file elife-77185-fig5-data2.csv]

condition	trial	accuracy	standard_error	atypical_features	test_type
Intact	0	0.485	0.035428107	prototypes	gen
Intact	0	0.523	0.02349714	1 atypical	gen
Intact	0	0.494	0.021637024	2 atypical	gen
Intact	0	0.509	0.022091518	3 atypical	gen
Intact	0	0.478	0.021677861	4 atypical	gen
Intact	20	0.99	0.007053279	prototypes	gen
Intact	20	0.937	0.011568238	1 atypical	gen
Intact	20	0.882	0.01515017	2 atypical	gen
Intact	20	0.788	0.018520124	3 atypical	gen
Intact	20	0.649	0.022573053	4 atypical	gen
Intact	40	0.98	0.009924337	prototypes	gen
Intact	40	0.943	0.010358159	1 atypical	gen
Intact	40	0.887	0.014773159	2 atypical	gen
Intact	40	0.803	0.017506783	3 atypical	gen
Intact	40	0.652	0.020992461	4 atypical	gen
Intact	60	0.98	0.009924337	prototypes	gen
Intact	60	0.936	0.011584082	1 atypical	gen
Intact	60	0.872	0.015338066	2 atypical	gen
Intact	60	0.781	0.019521796	3 atypical	gen
Intact	60	0.656	0.020844483	4 atypical	gen
Intact	80	0.975	0.011067404	prototypes	gen
Intact	80	0.932	0.012950621	1 atypical	gen
Intact	80	0.883	0.015222141	2 atypical	gen
Intact	80	0.793	0.018775452	3 atypical	gen
Intact	80	0.658	0.020079741	4 atypical	gen
Intact	100	0.98	0.009924337	prototypes	gen
Intact	100	0.951	0.009563068	1 atypical	gen
Intact	100	0.882	0.014261731	2 atypical	gen
Intact	100	0.8	0.017707847	3 atypical	gen
Intact	100	0.663	0.018516732	4 atypical	gen
TSP only	0	0.505	0.035442288	prototypes	gen
TSP only	0	0.491	0.022182319	1 atypical	gen
TSP only	0	0.493	0.02058821	2 atypical	gen
TSP only	0	0.499	0.021963766	3 atypical	gen
TSP only	0	0.495	0.019280396	4 atypical	gen
TSP only	20	0.79	0.028873315	prototypes	gen
TSP only	20	0.732	0.023228816	1 atypical	gen
TSP only	20	0.677	0.020627225	2 atypical	gen
TSP only	20	0.614	0.021618436	3 atypical	gen
TSP only	20	0.563	0.020500153	4 atypical	gen
TSP only	40	0.81	0.027809474	prototypes	gen
TSP only	40	0.743	0.022117889	1 atypical	gen
TSP only	40	0.694	0.020784126	2 atypical	gen
TSP only	40	0.632	0.020664343	3 atypical	gen
TSP only	40	0.569	0.0207448	4 atypical	gen
TSP only	60	0.8	0.028355248	prototypes	gen
TSP only	60	0.734	0.022331896	1 atypical	gen
TSP only	60	0.697	0.02102774	2 atypical	gen
TSP only	60	0.636	0.020138216	3 atypical	gen
TSP only	60	0.563	0.019597841	4 atypical	gen
TSP only	80	0.81	0.027809474	prototypes	gen
TSP only	80	0.75	0.021489743	1 atypical	gen
TSP only	80	0.683	0.021089782	2 atypical	gen
TSP only	80	0.623	0.020989469	3 atypical	gen
TSP only	80	0.561	0.020184949	4 atypical	gen
TSP only	100	0.77	0.029832026	prototypes	gen
TSP only	100	0.726	0.022340895	1 atypical	gen
TSP only	100	0.667	0.021792881	2 atypical	gen
TSP only	100	0.611	0.020990426	3 atypical	gen
TSP only	100	0.56	0.019439379	4 atypical	gen
MSP only	0	0.465	0.035357116	prototypes	gen
MSP only	0	0.502	0.026712314	1 atypical	gen
MSP only	0	0.485	0.023826741	2 atypical	gen
MSP only	0	0.507	0.022545432	3 atypical	gen
MSP only	0	0.493	0.021774426	4 atypical	gen
MSP only	20	0.875	0.023444042	prototypes	gen
MSP only	20	0.832	0.023615002	1 atypical	gen
MSP only	20	0.783	0.024382937	2 atypical	gen
MSP only	20	0.696	0.026598069	3 atypical	gen
MSP only	20	0.602	0.028105687	4 atypical	gen
MSP only	40	0.99	0.007053279	prototypes	gen
MSP only	40	0.965	0.010838003	1 atypical	gen
MSP only	40	0.914	0.01503831	2 atypical	gen
MSP only	40	0.83	0.019426449	3 atypical	gen
MSP only	40	0.667	0.02521376	4 atypical	gen
MSP only	60	1	0	prototypes	gen
MSP only	60	0.995	0.003306002	1 atypical	gen
MSP only	60	0.98	0.00549097	2 atypical	gen
MSP only	60	0.935	0.010976219	3 atypical	gen
MSP only	60	0.751	0.020224742	4 atypical	gen
MSP only	80	1	0	prototypes	gen
MSP only	80	0.996	0.004	1 atypical	gen
MSP only	80	0.991	0.005360848	2 atypical	gen
MSP only	80	0.955	0.009235882	3 atypical	gen
MSP only	80	0.803	0.017847906	4 atypical	gen
MSP only	100	1	0	prototypes	gen
MSP only	100	1	0	1 atypical	gen
MSP only	100	0.997	0.001723325	2 atypical	gen
MSP only	100	0.973	0.006446923	3 atypical	gen
MSP only	100	0.824	0.016927869	4 atypical	gen
Intact	0	0.5125	0.024714276	4 atypical	rec
Intact	20	0.635	0.025480236	4 atypical	rec
Intact	40	0.7425	0.020243156	4 atypical	rec
Intact	60	0.8825	0.016838133	4 atypical	rec
Intact	80	0.915	0.01242147	4 atypical	rec
Intact	100	0.9275	0.013896715	4 atypical	rec
Intact	0	0.496666667	0.022093059	3 atypical	rec
Intact	20	0.606666667	0.020033642	3 atypical	rec
Intact	40	0.748333333	0.015978205	3 atypical	rec
Intact	60	0.828333333	0.016489802	3 atypical	rec
Intact	80	0.886666667	0.013163907	3 atypical	rec
Intact	100	0.911666667	0.011714668	3 atypical	rec
Intact	0	0.506666667	0.019808284	2 atypical	rec
Intact	20	0.578333333	0.019742307	2 atypical	rec
Intact	40	0.723333333	0.01970888	2 atypical	rec
Intact	60	0.775	0.016476184	2 atypical	rec
Intact	80	0.808333333	0.017306733	2 atypical	rec
Intact	100	0.88	0.014618224	2 atypical	rec
Intact	0	0.38	0.023963356	1 atypical	rec
Intact	20	0.4425	0.022149344	1 atypical	rec
Intact	40	0.51	0.021590776	1 atypical	rec
Intact	60	0.6375	0.022856326	1 atypical	rec
Intact	80	0.68	0.021343747	1 atypical	rec
Intact	100	0.72	0.020188506	1 atypical	rec
MSP only	0	0.505	0.025370985	4 atypical	rec
MSP only	20	0.5775	0.024281337	4 atypical	rec
MSP only	40	0.55	0.027293763	4 atypical	rec
MSP only	60	0.5225	0.024897517	4 atypical	rec
MSP only	80	0.5225	0.023054339	4 atypical	rec
MSP only	100	0.52	0.020621652	4 atypical	rec
MSP only	0	0.463333333	0.020457725	3 atypical	rec
MSP only	20	0.571666667	0.018235121	3 atypical	rec
MSP only	40	0.5	0.019819613	3 atypical	rec
MSP only	60	0.533333333	0.016917307	3 atypical	rec
MSP only	80	0.59	0.018715784	3 atypical	rec
MSP only	100	0.583333333	0.015443318	3 atypical	rec
MSP only	0	0.516666667	0.017000033	2 atypical	rec
MSP only	20	0.518333333	0.019945915	2 atypical	rec
MSP only	40	0.516666667	0.021904291	2 atypical	rec
MSP only	60	0.61	0.023950473	2 atypical	rec
MSP only	80	0.743333333	0.019878983	2 atypical	rec
MSP only	100	0.825	0.016304998	2 atypical	rec
MSP only	0	0.41	0.023170427	1 atypical	rec
MSP only	20	0.35	0.019784189	1 atypical	rec
MSP only	40	0.3675	0.023956769	1 atypical	rec
MSP only	60	0.4325	0.020675157	1 atypical	rec
MSP only	80	0.4925	0.020552655	1 atypical	rec
MSP only	100	0.6725	0.015363853	1 atypical	rec
TSP only	0	0.45	0.023300843	4 atypical	rec
TSP only	20	0.5525	0.026660747	4 atypical	rec
TSP only	40	0.61	0.023655781	4 atypical	rec
TSP only	60	0.7225	0.024072439	4 atypical	rec
TSP only	80	0.7425	0.021746647	4 atypical	rec
TSP only	100	0.745	0.021608313	4 atypical	rec
TSP only	0	0.516666667	0.017326987	3 atypical	rec
TSP only	20	0.551666667	0.017358535	3 atypical	rec
TSP only	40	0.583333333	0.02044675	3 atypical	rec
TSP only	60	0.636666667	0.017787245	3 atypical	rec
TSP only	80	0.706666667	0.018968933	3 atypical	rec
TSP only	100	0.77	0.015674151	3 atypical	rec
TSP only	0	0.476666667	0.020789685	2 atypical	rec
TSP only	20	0.548333333	0.023723884	2 atypical	rec
TSP only	40	0.571666667	0.022380121	2 atypical	rec
TSP only	60	0.673333333	0.01952293	2 atypical	rec
TSP only	80	0.78	0.017549033	2 atypical	rec
TSP only	100	0.871666667	0.015325682	2 atypical	rec
TSP only	0	0.38	0.0220422	1 atypical	rec
TSP only	20	0.32	0.022495791	1 atypical	rec
TSP only	40	0.4025	0.020990318	1 atypical	rec
TSP only	60	0.4775	0.023326568	1 atypical	rec
TSP only	80	0.6075	0.020796938	1 atypical	rec
TSP only	100	0.7025	0.018011991	1 atypical	rec
