# Supplementary material for: A neural network model of hippocampal contributions to category learning
Source: eLife. 2023 Dec 11;12:e77185. doi: 10.7554/eLife.77185 (PMC10712951; doi:10.7554/eLife.77185)
Supplement: Figure 5—source data 3. [file elife-77185-fig5-data3.xlsx]

## Sheet: DG_MeanCorMatrix_test_init
item	test02_protB	test03_cB_f1	test24_cB_f1	test28_cB_f1	test34_cB_f1	test36_cB_f1	test07_cB_f2	test11_cB_f2	test15_cB_f2	test20_cB_f2	test29_cB_f2	test16_cB_f3	test17_cB_f3	test18_cB_f3	test21_cB_f3	test31_cB_f3	test14_cB_f4	test19_cB_f4	test33_cB_f4	test37_cB_f4	test40_cB_f4	test05_cA_f6	test22_cA_f6	test27_cA_f6	test35_cA_f6	test42_cA_f6	test09_cA_f7	test10_cA_f7	test12_cA_f7	test30_cA_f7	test41_cA_f7	test06_cA_f8	test08_cA_f8	test13_cA_f8	test25_cA_f8	test38_cA_f8	test04_cA_f9	test23_cA_f9	test26_cA_f9	test32_cA_f9	test39_cA_f9	test01_protA
test02_protB	1	0.731535	0.751693	0.728491	0.783125	0.756448	0.604809	0.595643	0.560943	0.519832	0.564298	0.428529	0.376624	0.475914	0.440204	0.39372	0.347928	0.305122	0.294558	0.283737	0.206305	0.105663	0.0713378	0.143769	0.132354	0.0881478	0.0389008	0.0534328	0.0283133	0.0370503	0.0450131	0.00362954	0.00681113	0.017537	0.00161412	0.036627	-0.00667928	-0.0069001	-0.00665768	-0.0067723	-0.00652772	-0.00658764
test03_cB_f1	0.731535	1	0.554709	0.521244	0.565668	0.557542	0.429168	0.409224	0.760446	0.384378	0.393949	0.281955	0.234481	0.358182	0.312939	0.566414	0.234952	0.197573	0.365045	0.163342	0.329792	0.174164	0.132703	0.082471	0.154701	0.0286036	0.0877139	0.110144	0.0750079	0.00306542	0.0922213	-0.00654091	0.0352028	0.06132	0.0189924	0.051354	-0.0018909	-0.00686345	-0.000525565	0.00573145	-0.00647843	-0.00657493
test24_cB_f1	0.751693	0.554709	1	0.526703	0.57528	0.564346	0.419689	0.453748	0.415066	0.371014	0.763828	0.548697	0.234095	0.316869	0.313304	0.268688	0.21922	0.437757	0.436972	0.156934	0.135037	0.0364649	0.0272378	0.20169	0.217923	0.162349	0.00651317	0.0976451	0.0811697	0.0717815	0.00221086	0.0344418	-0.00664849	0.0312787	0.0435803	0.0755685	0.00222152	0.0132616	0.0203392	0.000839043	-0.00194153	-0.00642897
test28_cB_f1	0.728491	0.521244	0.526703	1	0.577457	0.52629	0.455725	0.442232	0.369035	0.694817	0.39188	0.323995	0.508713	0.369277	0.271947	0.262577	0.274297	0.199196	0.140853	0.376066	0.308595	0.0782469	0.13569	0.219224	0.0305079	0.146885	0.0763103	0.0244344	0.0846531	0.0789742	0.0790903	0.030117	0.0292422	0.0543901	0.0359776	-0.00690345	-0.00213058	-0.00698489	0.000940701	-0.00348862	0.0115639	-0.00669252
test34_cB_f1	0.783125	0.565668	0.57528	0.577457	1	0.597138	0.451821	0.445753	0.426784	0.412289	0.713323	0.305238	0.269625	0.368696	0.315031	0.541965	0.455195	0.403301	0.194246	0.193531	0.144436	0.189324	0.0368925	0.190836	0.0847231	0.144778	0.0809835	0.105329	0.0631112	0.0120764	0.101855	0.028795	-0.00692489	0.0442772	0.0165007	0.0734001	-0.00683642	0.0136324	0.00867264	0.00814672	0.00296476	-0.00665384
test36_cB_f1	0.756448	0.557542	0.564346	0.52629	0.597138	1	0.431458	0.407926	0.423077	0.705884	0.437554	0.274151	0.250972	0.314558	0.561871	0.27494	0.198817	0.204025	0.40934	0.168434	0.332242	0.0412509	0.14544	0.0638278	0.201019	0.155992	0.0783615	0.0128058	0.00762075	0.0718783	0.0938873	0.021539	0.021984	-0.00714965	0.0587643	0.080101	-0.00297084	0.00668364	0.00328626	-0.00334954	-0.00019277	-0.00684944
test07_cB_f2	0.604809	0.429168	0.419689	0.455725	0.451821	0.431458	1	0.331666	0.305597	0.283419	0.290195	0.38816	0.384659	0.424704	0.396492	0.187676	0.288488	0.262735	0.258531	0.305369	0.0878102	0.255375	0.0640169	0.0912037	0.114791	0.0689392	0.111958	0.0244465	0.0196697	0.0202465	0.0448277	0.0707686	0.0715313	0.0904966	0.00140874	0.0145051	0.0253926	0.0347205	0.0261702	0.0179592	0.0359506	0.0129497
test11_cB_f2	0.595643	0.409224	0.453748	0.442232	0.445753	0.407926	0.331666	1	0.306596	0.258344	0.317214	0.425242	0.206764	0.454819	0.395431	0.382065	0.567421	0.142596	0.114424	0.267884	0.215726	0.248528	0.0889858	0.130052	0.117058	0.0631567	0.0221893	0.16808	0.0207982	0.15008	0.0141635	0.00396703	0.0902514	0.079535	-0.00208405	0.117243	0.0654608	0.0475125	-0.00685786	0.0156989	0.0243552	0.00396374
test15_cB_f2	0.560943	0.760446	0.415066	0.369035	0.426784	0.423077	0.305597	0.306596	1	0.259518	0.289794	0.197037	0.345958	0.458169	0.232915	0.419024	0.152965	0.267388	0.256004	0.252709	0.209288	0.103784	0.200604	0.117016	0.232992	0.00903948	0.0394907	0.153073	0.132621	0.0356939	0.145992	0.0101586	0.0911669	0.0246295	0.0362375	0.0782932	0.0385748	0.00701636	0.0276557	-0.00697626	-0.00664803	0.00184667
test20_cB_f2	0.519832	0.384378	0.371014	0.694817	0.412289	0.705884	0.283419	0.258344	0.259518	1	0.279497	0.169802	0.342025	0.209439	0.37557	0.154407	0.123792	0.106814	0.230453	0.231746	0.507986	0.0141937	0.249907	0.112191	0.0742493	0.252229	0.144247	-0.00681996	0.0402886	0.143107	0.165268	0.0753433	0.0710725	-0.00256083	0.12673	0.0207355	0.025328	-0.00687992	0.0365571	0.030221	0.0439521	0.0168634
test29_cB_f2	0.564298	0.393949	0.763828	0.39188	0.713323	0.437554	0.290195	0.317214	0.289794	0.279497	1	0.402578	0.145884	0.220496	0.212326	0.377631	0.290431	0.58333	0.308472	0.0890419	0.0880788	0.0866868	0.00692026	0.28841	0.154298	0.245076	0.0272407	0.189711	0.152581	0.0340332	0.0318622	0.0967013	-0.00674764	0.0979713	0.0943018	0.14967	-0.00666413	0.0715388	0.072135	0.0501591	0.0406315	0.0271057
test16_cB_f3	0.428529	0.281955	0.548697	0.323995	0.305238	0.274151	0.38816	0.425242	0.197037	0.169802	0.402578	1	0.133741	0.268711	0.0983495	0.233737	0.34553	0.411899	0.174552	0.0890826	0.135827	0.112835	0.119046	0.179773	0.0457171	0.119558	0.0405924	0.255831	0.0761711	0.197071	-0.0072342	0.0187187	0.0453476	0.121649	0.112648	0.0437151	0.0850972	0.0957815	0.00958341	0.0579583	0.0469166	0.0311578
test17_cB_f3	0.376624	0.234481	0.234095	0.508713	0.269625	0.250972	0.384659	0.206764	0.345958	0.342025	0.145884	0.133741	1	0.339925	0.254389	0.0750405	0.0987492	0.150685	0.109505	0.761231	0.128623	0.0520872	0.183096	0.19542	0.13375	0.167688	0.109884	0.00500037	0.26181	0.1368	0.277631	0.185443	0.211711	0.0778624	0.0573051	0.0294566	0.140895	0.0116834	0.123121	0.036032	0.139718	0.0911083
test18_cB_f3	0.475914	0.358182	0.316869	0.369277	0.368696	0.314558	0.424704	0.454819	0.458169	0.209439	0.220496	0.268711	0.339925	1	0.294774	0.153211	0.419718	0.371333	0.0654727	0.475856	0.0430685	0.158407	0.124077	0.363184	0.206344	-0.00730395	0.00842937	0.219961	0.00375805	0.208771	0.110605	0.140508	0.13962	0.0422108	0.0116407	0.0490948	0.0909011	0.0664489	0.0875181	-0.000303937	0.0731123	0.0371417
test21_cB_f3	0.440204	0.312939	0.313304	0.271947	0.315031	0.561871	0.396492	0.395431	0.232915	0.37557	0.212326	0.0983495	0.254389	0.294774	1	0.116302	0.150797	0.05858	0.385936	0.328797	0.145702	0.135558	0.0220182	0.0421002	0.405141	0.103857	0.0508935	0.0166148	-0.000527765	0.071269	0.215881	0.134394	0.116479	0.0233271	-0.00703404	0.184178	0.0711615	0.0961229	0.0868397	0.0600954	0.0619339	0.0346357
test31_cB_f3	0.39372	0.566414	0.268688	0.262577	0.541965	0.27494	0.187676	0.382065	0.419024	0.154407	0.377631	0.233737	0.0750405	0.153211	0.116302	1	0.415963	0.1779	0.180599	0.0346063	0.313567	0.378582	0.114337	0.0531842	0.0562426	0.105921	0.214475	0.272427	0.201508	-0.00152473	0.109747	-0.00690768	0.0266498	0.15222	0.11008	0.178208	-0.0015575	0.0770875	0.0174952	0.0592044	0.00393015	0.0300999
test14_cB_f4	0.347928	0.234952	0.21922	0.274297	0.455195	0.198817	0.288488	0.567421	0.152965	0.123792	0.290431	0.34553	0.0987492	0.419718	0.150797	0.415963	1	0.287418	0.00151498	0.132899	0.0856259	0.515332	0.0780424	0.269444	0.0159655	0.0511052	0.14463	0.355862	0.0268939	0.103816	0.0454294	0.0793169	0.0553836	0.217678	0.0610473	0.107427	0.0225936	0.159256	0.0469551	0.11133	0.124131	0.0809814
test19_cB_f4	0.305122	0.197573	0.437757	0.199196	0.403301	0.204025	0.262735	0.142596	0.267388	0.106814	0.58333	0.411899	0.150685	0.371333	0.05858	0.1779	0.287418	1	0.133708	0.103498	0.00634087	0.104525	0.044322	0.520129	0.106625	0.10017	0.0246355	0.392094	0.16755	0.118273	0.050589	0.225959	0.00639875	0.118353	0.218068	0.124842	0.0351841	0.187041	0.168242	0.0622293	0.144996	0.10601
test33_cB_f4	0.294558	0.365045	0.436972	0.140853	0.194246	0.40934	0.258531	0.114424	0.256004	0.230453	0.308472	0.174552	0.109505	0.0654727	0.385936	0.180599	0.00151498	0.133708	1	0.0560398	0.25552	0.06852	0.0945357	0.0170014	0.585169	0.224054	0.134933	0.0454727	0.136592	0.0650698	0.140393	0.104093	0.0916943	0.0561692	0.145036	0.312345	0.172456	0.199186	0.188112	0.144599	0.0514281	0.11967
test37_cB_f4	0.283737	0.163342	0.156934	0.376066	0.193531	0.168434	0.305369	0.267884	0.252709	0.231746	0.0890419	0.0890826	0.761231	0.475856	0.328797	0.0346063	0.132899	0.103498	0.0560398	1	0.0628426	0.0899228	0.121338	0.320565	0.240784	0.0954468	0.0719251	0.050486	0.185008	0.221027	0.383913	0.298616	0.314547	0.130897	0.0314264	0.0806282	0.238581	0.0527556	0.226577	0.0712762	0.221973	0.160674
test40_cB_f4	0.206305	0.329792	0.135037	0.308595	0.144436	0.332242	0.0878102	0.215726	0.209288	0.507986	0.0880788	0.135827	0.128623	0.0430685	0.145702	0.313567	0.0856259	0.00634087	0.25552	0.0628426	1	0.070134	0.540143	0.0153057	0.0885287	0.259101	0.34782	0.0209616	0.141747	0.170677	0.186245	0.0148204	0.266211	0.0502301	0.252193	0.107662	0.170861	0.049204	0.0482536	0.141613	0.0644018	0.105696
test05_cA_f6	0.105663	0.174164	0.0364649	0.0782469	0.189324	0.0412509	0.255375	0.248528	0.103784	0.0141937	0.0866868	0.112835	0.0520872	0.158407	0.135558	0.378582	0.515332	0.104525	0.06852	0.0899228	0.070134	1	0.0672914	0.101638	0.0950811	0.0777132	0.366711	0.348536	0.183831	0.0286662	0.175627	0.111255	0.218907	0.517604	0.0768896	0.264149	0.141167	0.35452	0.169152	0.303438	0.174453	0.231379
test22_cA_f6	0.0713378	0.132703	0.0272378	0.13569	0.0368925	0.14544	0.0640169	0.0889858	0.200604	0.249907	0.00692026	0.119046	0.183096	0.124077	0.0220182	0.114337	0.0780424	0.044322	0.0945357	0.121338	0.540143	0.0672914	1	0.0941828	0.0884014	0.12536	0.356851	0.0905187	0.129365	0.37762	0.179396	0.114329	0.532716	0.0798167	0.491936	0.0669132	0.394479	0.144808	0.169332	0.18589	0.194351	0.254606
test27_cA_f6	0.143769	0.082471	0.20169	0.219224	0.190836	0.0638278	0.0912037	0.130052	0.117016	0.112191	0.28841	0.179773	0.19542	0.363184	0.0421002	0.0531842	0.269444	0.520129	0.0170014	0.320565	0.0153057	0.101638	0.0941828	1	0.12332	0.0984785	0.0438528	0.377422	0.225194	0.361948	0.205088	0.524703	0.126684	0.305702	0.284553	0.133728	0.195293	0.183425	0.427607	0.200242	0.395897	0.315469
test35_cA_f6	0.132354	0.154701	0.217923	0.0305079	0.0847231	0.201019	0.114791	0.117058	0.232992	0.0742493	0.154298	0.0457171	0.13375	0.206344	0.405141	0.0562426	0.0159655	0.106625	0.585169	0.240784	0.0885287	0.0950811	0.0884014	0.12332	1	0.0948874	0.0540848	0.170483	0.133206	0.216286	0.331433	0.272777	0.275744	0.0833547	0.122466	0.536448	0.399432	0.398065	0.38789	0.179303	0.173181	0.272983
test42_cA_f6	0.0881478	0.0286036	0.162349	0.146885	0.144778	0.155992	0.0689392	0.0631567	0.00903948	0.252229	0.245076	0.119558	0.167688	-0.00730395	0.103857	0.105921	0.0511052	0.10017	0.224054	0.0954468	0.259101	0.0777132	0.12536	0.0984785	0.0948874	1	0.401294	0.0556992	0.398742	0.19412	0.221894	0.310055	0.14439	0.253761	0.343593	0.295744	0.216131	0.227377	0.255842	0.430875	0.434561	0.355198
test09_cA_f7	0.0389008	0.0877139	0.00651317	0.0763103	0.0809835	0.0783615	0.111958	0.0221893	0.0394907	0.144247	0.0272407	0.0405924	0.109884	0.00842937	0.0508935	0.214475	0.14463	0.0246355	0.134933	0.0719251	0.34782	0.366711	0.356851	0.0438528	0.0540848	0.401294	1	0.0834878	0.263562	0.110768	0.33883	0.227608	0.398923	0.355514	0.386225	0.199287	0.282531	0.295524	0.313814	0.543297	0.331222	0.431438
test10_cA_f7	0.0534328	0.110144	0.0976451	0.0244344	0.105329	0.0128058	0.0244465	0.16808	0.153073	-0.00681996	0.189711	0.255831	0.00500037	0.219961	0.0166148	0.272427	0.355862	0.392094	0.0454727	0.050486	0.0209616	0.348536	0.0905187	0.377422	0.170483	0.0556992	0.0834878	1	0.280272	0.209784	0.130772	0.197455	0.125823	0.405651	0.339864	0.405973	0.22469	0.530986	0.287013	0.261438	0.270379	0.364444
test12_cA_f7	0.0283133	0.0750079	0.0811697	0.0846531	0.0631112	0.00762075	0.0196697	0.0207982	0.132621	0.0402886	0.152581	0.0761711	0.26181	0.00375805	-0.000527765	0.201508	0.0268939	0.16755	0.136592	0.185008	0.141747	0.183831	0.129365	0.225194	0.133206	0.398742	0.263562	0.280272	1	0.114976	0.302022	0.234835	0.195987	0.442593	0.368064	0.330549	0.260184	0.258029	0.304791	0.287187	0.322009	0.407433
test30_cA_f7	0.0370503	0.00306542	0.0717815	0.0789742	0.0120764	0.0718783	0.0202465	0.15008	0.0356939	0.143107	0.0340332	0.197071	0.1368	0.208771	0.071269	-0.00152473	0.103816	0.118273	0.0650698	0.221027	0.170677	0.0286662	0.37762	0.361948	0.216286	0.19412	0.110768	0.209784	0.114976	1	0.134625	0.414062	0.424967	0.174046	0.404777	0.17757	0.596845	0.26811	0.325454	0.301354	0.525901	0.409927
test41_cA_f7	0.0450131	0.0922213	0.00221086	0.0790903	0.101855	0.0938873	0.0448277	0.0141635	0.145992	0.165268	0.0318622	-0.0072342	0.277631	0.110605	0.215881	0.109747	0.0454294	0.050589	0.140393	0.383913	0.186245	0.175627	0.179396	0.205088	0.331433	0.221894	0.33883	0.130772	0.302022	0.134625	1	0.456453	0.411079	0.194173	0.22507	0.381369	0.305411	0.304219	0.581978	0.32621	0.361997	0.467112
test06_cA_f8	0.00362954	-0.00654091	0.0344418	0.030117	0.028795	0.021539	0.0707686	0.00396703	0.0101586	0.0753433	0.0967013	0.0187187	0.185443	0.140508	0.134394	-0.00690768	0.0793169	0.225959	0.104093	0.298616	0.0148204	0.111255	0.114329	0.524703	0.272777	0.310055	0.227608	0.197455	0.234835	0.414062	0.456453	1	0.322592	0.323708	0.35315	0.322081	0.444406	0.428636	0.806977	0.496683	0.788017	0.645466
test08_cA_f8	0.00681113	0.0352028	-0.00664849	0.0292422	-0.00692489	0.021984	0.0715313	0.0902514	0.0911669	0.0710725	-0.00674764	0.0453476	0.211711	0.13962	0.116479	0.0266498	0.0553836	0.00639875	0.0916943	0.314547	0.266211	0.218907	0.532716	0.126684	0.275744	0.14439	0.398923	0.125823	0.195987	0.424967	0.411079	0.322592	1	0.256573	0.253416	0.22976	0.759272	0.35218	0.410973	0.392965	0.428337	0.529767
test13_cA_f8	0.017537	0.06132	0.0312787	0.0543901	0.0442772	-0.00714965	0.0904966	0.079535	0.0246295	-0.00256083	0.0979713	0.121649	0.0778624	0.0422108	0.0233271	0.15222	0.217678	0.118353	0.0561692	0.130897	0.0502301	0.517604	0.0798167	0.305702	0.0833547	0.253761	0.355514	0.405651	0.442593	0.174046	0.194173	0.323708	0.256573	1	0.256214	0.254292	0.354319	0.346069	0.410825	0.657184	0.437736	0.524996
test25_cA_f8	0.00161412	0.0189924	0.0435803	0.0359776	0.0165007	0.0587643	0.00140874	-0.00208405	0.0362375	0.12673	0.0943018	0.112648	0.0573051	0.0116407	-0.00703404	0.11008	0.0610473	0.218068	0.145036	0.0314264	0.252193	0.0768896	0.491936	0.284553	0.122466	0.343593	0.386225	0.339864	0.368064	0.404777	0.22507	0.35315	0.253416	0.256214	1	0.305982	0.395221	0.425169	0.458881	0.450592	0.449166	0.577958
test38_cA_f8	0.036627	0.051354	0.0755685	-0.00690345	0.0734001	0.080101	0.0145051	0.117243	0.0782932	0.0207355	0.14967	0.0437151	0.0294566	0.0490948	0.184178	0.178208	0.107427	0.124842	0.312345	0.0806282	0.107662	0.264149	0.0669132	0.133728	0.536448	0.295744	0.199287	0.405973	0.330549	0.17757	0.381369	0.322081	0.22976	0.254292	0.305982	1	0.342623	0.75875	0.429942	0.409543	0.406239	0.537045
test04_cA_f9	-0.00667928	-0.0018909	0.00222152	-0.00213058	-0.00683642	-0.00297084	0.0253926	0.0654608	0.0385748	0.025328	-0.00666413	0.0850972	0.140895	0.0909011	0.0711615	-0.0015575	0.0225936	0.0351841	0.172456	0.238581	0.170861	0.141167	0.394479	0.195293	0.399432	0.216131	0.282531	0.22469	0.260184	0.596845	0.305411	0.444406	0.759272	0.354319	0.395221	0.342623	1	0.495731	0.562801	0.55342	0.571371	0.711364
test23_cA_f9	-0.0069001	-0.00686345	0.0132616	-0.00698489	0.0136324	0.00668364	0.0347205	0.0475125	0.00701636	-0.00687992	0.0715388	0.0957815	0.0116834	0.0664489	0.0961229	0.0770875	0.159256	0.187041	0.199186	0.0527556	0.049204	0.35452	0.144808	0.183425	0.398065	0.227377	0.295524	0.530986	0.258029	0.26811	0.304219	0.428636	0.35218	0.346069	0.425169	0.75875	0.495731	1	0.558974	0.556958	0.539714	0.701982
test26_cA_f9	-0.00665768	-0.000525565	0.0203392	0.000940701	0.00867264	0.00328626	0.0261702	-0.00685786	0.0276557	0.0365571	0.072135	0.00958341	0.123121	0.0875181	0.0868397	0.0174952	0.0469551	0.168242	0.188112	0.226577	0.0482536	0.169152	0.169332	0.427607	0.38789	0.255842	0.313814	0.287013	0.304791	0.325454	0.581978	0.806977	0.410973	0.410825	0.458881	0.429942	0.562801	0.558974	1	0.620011	0.642774	0.797242
test32_cA_f9	-0.0067723	0.00573145	0.000839043	-0.00348862	0.00814672	-0.00334954	0.0179592	0.0156989	-0.00697626	0.030221	0.0501591	0.0579583	0.036032	-0.000303937	0.0600954	0.0592044	0.11133	0.0622293	0.144599	0.0712762	0.141613	0.303438	0.18589	0.200242	0.179303	0.430875	0.543297	0.261438	0.287187	0.301354	0.32621	0.496683	0.392965	0.657184	0.450592	0.409543	0.55342	0.556958	0.620011	1	0.634331	0.788209
test39_cA_f9	-0.00652772	-0.00647843	-0.00194153	0.0115639	0.00296476	-0.00019277	0.0359506	0.0243552	-0.00664803	0.0439521	0.0406315	0.0469166	0.139718	0.0731123	0.0619339	0.00393015	0.124131	0.144996	0.0514281	0.221973	0.0644018	0.174453	0.194351	0.395897	0.173181	0.434561	0.331222	0.270379	0.322009	0.525901	0.361997	0.788017	0.428337	0.437736	0.449166	0.406239	0.571371	0.539714	0.642774	0.634331	1	0.798802
test01_protA	-0.00658764	-0.00657493	-0.00642897	-0.00669252	-0.00665384	-0.00684944	0.0129497	0.00396374	0.00184667	0.0168634	0.0271057	0.0311578	0.0911083	0.0371417	0.0346357	0.0300999	0.0809814	0.10601	0.11967	0.160674	0.105696	0.231379	0.254606	0.315469	0.272983	0.355198	0.431438	0.364444	0.407433	0.409927	0.467112	0.645466	0.529767	0.524996	0.577958	0.537045	0.711364	0.701982	0.797242	0.788209	0.798802	1

## Sheet: DG_MeanCorMatrix_test_set
item	test02_protB	test03_cB_f1	test24_cB_f1	test28_cB_f1	test34_cB_f1	test36_cB_f1	test07_cB_f2	test11_cB_f2	test15_cB_f2	test20_cB_f2	test29_cB_f2	test16_cB_f3	test17_cB_f3	test18_cB_f3	test21_cB_f3	test31_cB_f3	test14_cB_f4	test19_cB_f4	test33_cB_f4	test37_cB_f4	test40_cB_f4	test05_cA_f6	test22_cA_f6	test27_cA_f6	test35_cA_f6	test42_cA_f6	test09_cA_f7	test10_cA_f7	test12_cA_f7	test30_cA_f7	test41_cA_f7	test06_cA_f8	test08_cA_f8	test13_cA_f8	test25_cA_f8	test38_cA_f8	test04_cA_f9	test23_cA_f9	test26_cA_f9	test32_cA_f9	test39_cA_f9	test01_protA
test02_protB	1	0.72197	0.78968	0.756266	0.712289	0.80563	0.639927	0.601063	0.587835	0.598082	0.557006	0.534806	0.454225	0.514921	0.452583	0.403908	0.334549	0.364459	0.353864	0.314748	0.329885	0.153285	0.117299	0.124925	0.120795	0.210701	0.0840094	0.0862521	0.101348	0.132003	0.0837898	0.0450369	0.0750475	0.0299552	0.0424066	0.0456816	0.0469776	0.0257117	0.0416141	0.0142555	0.0353375	0.0174929
test03_cB_f1	0.72197	1	0.585447	0.518025	0.512414	0.599075	0.492765	0.443061	0.800092	0.426729	0.395398	0.405855	0.297938	0.434651	0.292858	0.533527	0.277973	0.304821	0.476387	0.225381	0.406133	0.207294	0.173682	0.113905	0.223201	0.13054	0.0797741	0.157052	0.175024	0.102234	0.119034	0.0280861	0.0956154	0.0793162	0.0635649	0.0943619	0.0713576	0.0584129	0.0582395	0.0437512	0.0151802	0.0233621
test24_cB_f1	0.78968	0.585447	1	0.642794	0.602583	0.675999	0.51872	0.515621	0.502453	0.53682	0.689342	0.623135	0.399523	0.433232	0.357953	0.36218	0.261644	0.387396	0.446412	0.277726	0.307112	0.108033	0.0849611	0.150883	0.232167	0.267289	0.043823	0.152619	0.18641	0.186349	0.0832932	0.0451043	0.0569411	0.0499913	0.0728241	0.158852	0.0724879	0.0750072	0.0539416	0.0178413	0.0597998	0.0338409
test28_cB_f1	0.756266	0.518025	0.642794	1	0.59741	0.629513	0.523982	0.51817	0.443299	0.708878	0.498009	0.419638	0.552212	0.42302	0.421282	0.376773	0.295788	0.276445	0.288757	0.416601	0.445527	0.154676	0.221206	0.211704	0.112437	0.251355	0.12779	0.0879014	0.128012	0.246102	0.159239	0.057885	0.13235	0.0851228	0.0802778	0.0741642	0.101537	0.0290289	0.0651344	0.0321392	0.0661436	0.0285389
test34_cB_f1	0.712289	0.512414	0.602583	0.59741	1	0.636289	0.481957	0.496514	0.450669	0.511351	0.759239	0.441483	0.380059	0.404139	0.380945	0.512954	0.471128	0.445875	0.285269	0.260877	0.31448	0.24942	0.108012	0.217886	0.130408	0.313681	0.173119	0.163727	0.177856	0.128459	0.154857	0.131389	0.10432	0.115367	0.0871632	0.0966705	0.0750462	0.088877	0.115263	0.103877	0.123616	0.0660649
test36_cB_f1	0.80563	0.599075	0.675999	0.629513	0.636289	1	0.567614	0.52049	0.480205	0.703792	0.510971	0.478732	0.388174	0.453353	0.566784	0.361726	0.327165	0.309201	0.424579	0.273732	0.359522	0.129095	0.161037	0.12068	0.165844	0.282442	0.129339	0.0686814	0.0955125	0.203558	0.126425	0.0996538	0.136365	0.0257047	0.0733276	0.079161	0.100075	0.0607919	0.0696924	0.0499208	0.0861145	0.0290782
test07_cB_f2	0.639927	0.492765	0.51872	0.523982	0.481957	0.567614	1	0.403552	0.41793	0.409387	0.422799	0.525143	0.497002	0.564081	0.428029	0.28735	0.31	0.385783	0.288244	0.365328	0.225582	0.256429	0.154346	0.141591	0.123749	0.19515	0.17792	0.113138	0.126236	0.14313	0.144168	0.110212	0.187159	0.0987314	0.0594464	0.0413768	0.0833739	0.0820491	0.0704442	0.0458534	0.0755864	0.0437308
test11_cB_f2	0.601063	0.443061	0.515621	0.51817	0.496514	0.52049	0.403552	1	0.432413	0.434734	0.412213	0.52448	0.329508	0.520901	0.415147	0.436246	0.492789	0.275542	0.167957	0.359966	0.365798	0.231405	0.193465	0.176422	0.146084	0.220061	0.110241	0.205648	0.1222	0.22831	0.105256	0.0564733	0.159569	0.111952	0.0702955	0.158159	0.128859	0.0771769	0.0585046	0.090165	0.10904	0.0729634
test15_cB_f2	0.587835	0.800092	0.502453	0.443299	0.450669	0.480205	0.41793	0.432413	1	0.343328	0.337827	0.372671	0.365442	0.485933	0.308305	0.463147	0.268982	0.335143	0.421986	0.31205	0.348852	0.207422	0.264028	0.175126	0.362355	0.099431	0.0692454	0.226743	0.256139	0.185562	0.204933	0.0653382	0.174899	0.107232	0.114911	0.187764	0.163509	0.123199	0.132984	0.059259	0.0615657	0.0770869
test20_cB_f2	0.598082	0.426729	0.53682	0.708878	0.511351	0.703792	0.409387	0.434734	0.343328	1	0.44533	0.388565	0.528163	0.371655	0.469234	0.324615	0.268381	0.229022	0.324758	0.379484	0.550105	0.128544	0.272933	0.191976	0.145087	0.356709	0.187294	0.074529	0.146485	0.323526	0.187886	0.131286	0.196096	0.0693587	0.14149	0.0977744	0.153284	0.0486831	0.108113	0.0584663	0.12024	0.0592644
test29_cB_f2	0.557006	0.395398	0.689342	0.498009	0.759239	0.510971	0.422799	0.412213	0.337827	0.44533	1	0.505559	0.37137	0.366909	0.324206	0.448356	0.348312	0.539638	0.400931	0.259545	0.246771	0.172413	0.0686849	0.287962	0.259754	0.413617	0.154209	0.234921	0.276474	0.189086	0.166804	0.145204	0.0885427	0.151718	0.152064	0.22389	0.123417	0.15445	0.157683	0.115135	0.149859	0.0931753
test16_cB_f3	0.534806	0.405855	0.623135	0.419638	0.441483	0.478732	0.525143	0.52448	0.372671	0.388565	0.505559	1	0.309596	0.430414	0.292714	0.38668	0.367643	0.476195	0.285317	0.230106	0.322488	0.206607	0.232369	0.206487	0.163331	0.295656	0.173106	0.292413	0.207542	0.266386	0.0580238	0.101373	0.186186	0.131433	0.175413	0.164712	0.147933	0.15908	0.0969255	0.0971781	0.153021	0.0896721
test17_cB_f3	0.454225	0.297938	0.399523	0.552212	0.380059	0.388174	0.497002	0.329508	0.365442	0.528163	0.37137	0.309596	1	0.371435	0.405013	0.254604	0.164983	0.273014	0.260163	0.684889	0.326197	0.176714	0.22859	0.213007	0.213694	0.289597	0.220991	0.0875771	0.30002	0.253969	0.322379	0.158203	0.285312	0.146996	0.0989785	0.144874	0.194853	0.0825341	0.155475	0.0914321	0.137982	0.108283
test18_cB_f3	0.514921	0.434651	0.433232	0.42302	0.404139	0.453353	0.564081	0.520901	0.485933	0.371655	0.366909	0.430414	0.371435	1	0.352063	0.230185	0.4688	0.418596	0.151103	0.419728	0.206597	0.260801	0.181405	0.337125	0.211524	0.0948359	0.0890657	0.269362	0.104	0.274291	0.158534	0.182007	0.199085	0.136698	0.0908311	0.117338	0.157774	0.126323	0.140161	0.0599738	0.136263	0.0827942
test21_cB_f3	0.452583	0.292858	0.357953	0.421282	0.380945	0.566784	0.428029	0.415147	0.308305	0.469234	0.324206	0.292714	0.405013	0.352063	1	0.200643	0.287242	0.211662	0.361993	0.469329	0.248398	0.258229	0.135076	0.127671	0.298363	0.313749	0.22783	0.0891045	0.108362	0.204209	0.313566	0.200667	0.313321	0.101181	0.0599403	0.188051	0.174817	0.147724	0.148369	0.141355	0.170734	0.0897533
test31_cB_f3	0.403908	0.533527	0.36218	0.376773	0.512954	0.361726	0.28735	0.436246	0.463147	0.324615	0.448356	0.38668	0.254604	0.230185	0.200643	1	0.418666	0.282965	0.313581	0.237629	0.489801	0.358789	0.255017	0.158466	0.203285	0.289633	0.255153	0.291442	0.308971	0.163087	0.205316	0.0558065	0.16529	0.210975	0.196992	0.253851	0.105127	0.164449	0.102972	0.155009	0.127611	0.123076
test14_cB_f4	0.334549	0.277973	0.261644	0.295788	0.471128	0.327165	0.31	0.492789	0.268982	0.268381	0.348312	0.367643	0.164983	0.4688	0.287242	0.418666	1	0.344028	0.115824	0.236149	0.253675	0.562637	0.263043	0.391099	0.0979941	0.257098	0.285859	0.371542	0.150779	0.265722	0.179011	0.226484	0.264241	0.365258	0.161673	0.198728	0.184338	0.243621	0.198928	0.284021	0.279083	0.211352
test19_cB_f4	0.364459	0.304821	0.387396	0.276445	0.445875	0.309201	0.385783	0.275542	0.335143	0.229022	0.539638	0.476195	0.273014	0.418596	0.211662	0.282965	0.344028	1	0.217419	0.199709	0.099361	0.202567	0.118423	0.445792	0.23993	0.235986	0.168277	0.374676	0.283715	0.28059	0.128835	0.314518	0.145995	0.219137	0.266972	0.222196	0.193684	0.276503	0.221385	0.145894	0.245433	0.181963
test33_cB_f4	0.353864	0.476387	0.446412	0.288757	0.285269	0.424579	0.288244	0.167957	0.421986	0.324758	0.400931	0.285317	0.260163	0.151103	0.361993	0.313581	0.115824	0.217419	1	0.212386	0.318705	0.154976	0.150546	0.11271	0.533167	0.322356	0.179939	0.140434	0.257486	0.133921	0.266258	0.140022	0.165482	0.133007	0.109053	0.315123	0.210953	0.192193	0.201657	0.164384	0.0983042	0.120517
test37_cB_f4	0.314748	0.225381	0.277726	0.416601	0.260877	0.273732	0.365328	0.359966	0.31205	0.379484	0.259545	0.230106	0.684889	0.419728	0.469329	0.237629	0.236149	0.199709	0.212386	1	0.260719	0.252813	0.198532	0.276582	0.323978	0.231762	0.210913	0.155295	0.251628	0.284481	0.40036	0.211197	0.361693	0.210415	0.0860123	0.192943	0.241944	0.118548	0.204376	0.128538	0.210281	0.153927
test40_cB_f4	0.329885	0.406133	0.307112	0.445527	0.31448	0.359522	0.225582	0.365798	0.348852	0.550105	0.246771	0.322488	0.326197	0.206597	0.248398	0.489801	0.253675	0.099361	0.318705	0.260719	1	0.219711	0.480085	0.104985	0.173622	0.294364	0.348653	0.117198	0.239578	0.280373	0.276306	0.081545	0.324389	0.16137	0.270579	0.156752	0.248159	0.11133	0.132572	0.190541	0.156026	0.156405
test05_cA_f6	0.153285	0.207294	0.108033	0.154676	0.24942	0.129095	0.256429	0.231405	0.207422	0.128544	0.172413	0.206607	0.176714	0.260801	0.258229	0.358789	0.562637	0.202567	0.154976	0.252813	0.219711	1	0.26753	0.318188	0.240219	0.266529	0.501459	0.410321	0.297955	0.195041	0.348533	0.317623	0.452524	0.561095	0.231434	0.386055	0.310015	0.437965	0.324787	0.482077	0.374001	0.408453
test22_cA_f6	0.117299	0.173682	0.0849611	0.221206	0.108012	0.161037	0.154346	0.193465	0.264028	0.272933	0.0686849	0.232369	0.22859	0.181405	0.135076	0.255017	0.263043	0.118423	0.150546	0.198532	0.480085	0.26753	1	0.212868	0.195894	0.222934	0.491204	0.267058	0.274409	0.46528	0.249972	0.22814	0.576887	0.264616	0.52288	0.23138	0.465317	0.293596	0.283232	0.296225	0.341256	0.350416
test27_cA_f6	0.124925	0.113905	0.150883	0.211704	0.217886	0.12068	0.141591	0.176422	0.175126	0.191976	0.287962	0.206487	0.213007	0.337125	0.127671	0.158466	0.391099	0.445792	0.11271	0.276582	0.104985	0.318188	0.212868	1	0.196598	0.207409	0.229274	0.475096	0.298898	0.486197	0.237578	0.55703	0.230302	0.467042	0.35597	0.238768	0.333237	0.297738	0.459951	0.362566	0.459284	0.403485
test35_cA_f6	0.120795	0.223201	0.232167	0.112437	0.130408	0.165844	0.123749	0.146084	0.362355	0.145087	0.259754	0.163331	0.213694	0.211524	0.298363	0.203285	0.0979941	0.23993	0.533167	0.323978	0.173622	0.240219	0.195894	0.196598	1	0.262619	0.192972	0.286569	0.40322	0.269153	0.467442	0.301721	0.327158	0.259713	0.222999	0.58309	0.421395	0.436839	0.402896	0.274741	0.305954	0.346182
test42_cA_f6	0.210701	0.13054	0.267289	0.251355	0.313681	0.282442	0.19515	0.220061	0.099431	0.356709	0.413617	0.295656	0.289597	0.0948359	0.313749	0.289633	0.257098	0.235986	0.322356	0.231762	0.294364	0.266529	0.222934	0.207409	0.262619	1	0.477008	0.122476	0.445154	0.290184	0.28673	0.309795	0.276564	0.301578	0.306459	0.356374	0.275529	0.24336	0.264606	0.373663	0.414189	0.29075
test09_cA_f7	0.0840094	0.0797741	0.043823	0.12779	0.173119	0.129339	0.17792	0.110241	0.0692454	0.187294	0.154209	0.173106	0.220991	0.0890657	0.22783	0.255153	0.285859	0.168277	0.179939	0.210913	0.348653	0.501459	0.491204	0.229274	0.192972	0.477008	1	0.200846	0.358274	0.285218	0.441331	0.435347	0.641291	0.479253	0.49499	0.32155	0.458344	0.421018	0.437153	0.587704	0.481034	0.527043
test10_cA_f7	0.0862521	0.157052	0.152619	0.0879014	0.163727	0.0686814	0.113138	0.205648	0.226743	0.074529	0.234921	0.292413	0.0875771	0.269362	0.0891045	0.291442	0.371542	0.374676	0.140434	0.155295	0.117198	0.410321	0.267058	0.475096	0.286569	0.122476	0.200846	1	0.371534	0.465391	0.231017	0.336283	0.287832	0.503482	0.460907	0.511633	0.451904	0.563998	0.424291	0.420774	0.436838	0.501533
test12_cA_f7	0.101348	0.175024	0.18641	0.128012	0.177856	0.0955125	0.126236	0.1222	0.256139	0.146485	0.276474	0.207542	0.30002	0.104	0.108362	0.308971	0.150779	0.283715	0.257486	0.251628	0.239578	0.297955	0.274409	0.298898	0.40322	0.445154	0.358274	0.371534	1	0.294484	0.40004	0.289808	0.297423	0.459503	0.458085	0.549302	0.421668	0.396001	0.409869	0.356625	0.443999	0.478711
test30_cA_f7	0.132003	0.102234	0.186349	0.246102	0.128459	0.203558	0.14313	0.22831	0.185562	0.323526	0.189086	0.266386	0.253969	0.274291	0.204209	0.163087	0.265722	0.28059	0.133921	0.284481	0.280373	0.195041	0.46528	0.486197	0.269153	0.290184	0.285218	0.465391	0.294484	1	0.25624	0.433583	0.454365	0.358133	0.502246	0.382531	0.598698	0.393428	0.391866	0.404837	0.577856	0.481117
test41_cA_f7	0.0837898	0.119034	0.0832932	0.159239	0.154857	0.126425	0.144168	0.105256	0.204933	0.187886	0.166804	0.0580238	0.322379	0.158534	0.313566	0.205316	0.179011	0.128835	0.266258	0.40036	0.276306	0.348533	0.249972	0.237578	0.467442	0.28673	0.441331	0.231017	0.40004	0.25624	1	0.41414	0.503638	0.345395	0.234042	0.502867	0.412911	0.392613	0.553888	0.412968	0.397096	0.466297
test06_cA_f8	0.0450369	0.0280861	0.0451043	0.057885	0.131389	0.0996538	0.110212	0.0564733	0.0653382	0.131286	0.145204	0.101373	0.158203	0.182007	0.200667	0.0558065	0.226484	0.314518	0.140022	0.211197	0.081545	0.317623	0.22814	0.55703	0.301721	0.309795	0.435347	0.336283	0.289808	0.433583	0.41414	1	0.437907	0.483442	0.398212	0.399487	0.532177	0.527474	0.700234	0.58512	0.712327	0.641574
test08_cA_f8	0.0750475	0.0956154	0.0569411	0.13235	0.10432	0.136365	0.187159	0.159569	0.174899	0.196096	0.0885427	0.186186	0.285312	0.199085	0.313321	0.16529	0.264241	0.145995	0.165482	0.361693	0.324389	0.452524	0.576887	0.230302	0.327158	0.276564	0.641291	0.287832	0.297423	0.454365	0.503638	0.437907	1	0.401718	0.371812	0.380477	0.706961	0.502891	0.48543	0.50094	0.538503	0.575012
test13_cA_f8	0.0299552	0.0793162	0.0499913	0.0851228	0.115367	0.0257047	0.0987314	0.111952	0.107232	0.0693587	0.151718	0.131433	0.146996	0.136698	0.101181	0.210975	0.365258	0.219137	0.133007	0.210415	0.16137	0.561095	0.264616	0.467042	0.259713	0.301578	0.479253	0.503482	0.459503	0.358133	0.345395	0.483442	0.401718	1	0.42697	0.452474	0.519411	0.524397	0.562861	0.734474	0.541199	0.648108
test25_cA_f8	0.0424066	0.0635649	0.0728241	0.0802778	0.0871632	0.0733276	0.0594464	0.0702955	0.114911	0.14149	0.152064	0.175413	0.0989785	0.0908311	0.0599403	0.196992	0.161673	0.266972	0.109053	0.0860123	0.270579	0.231434	0.52288	0.35597	0.222999	0.306459	0.49499	0.460907	0.458085	0.502246	0.234042	0.398212	0.371812	0.42697	1	0.369065	0.535453	0.489863	0.498657	0.480103	0.539639	0.612819
test38_cA_f8	0.0456816	0.0943619	0.158852	0.0741642	0.0966705	0.079161	0.0413768	0.158159	0.187764	0.0977744	0.22389	0.164712	0.144874	0.117338	0.188051	0.253851	0.198728	0.222196	0.315123	0.192943	0.156752	0.386055	0.23138	0.238768	0.58309	0.356374	0.32155	0.511633	0.549302	0.382531	0.502867	0.399487	0.380477	0.452474	0.369065	1	0.549771	0.701886	0.498434	0.492909	0.536202	0.599406
test04_cA_f9	0.0469776	0.0713576	0.0724879	0.101537	0.0750462	0.100075	0.0833739	0.128859	0.163509	0.153284	0.123417	0.147933	0.194853	0.157774	0.174817	0.105127	0.184338	0.193684	0.210953	0.241944	0.248159	0.310015	0.465317	0.333237	0.421395	0.275529	0.458344	0.451904	0.421668	0.598698	0.412911	0.532177	0.706961	0.519411	0.535453	0.549771	1	0.650307	0.640115	0.63184	0.659994	0.758033
test23_cA_f9	0.0257117	0.0584129	0.0750072	0.0290289	0.088877	0.0607919	0.0820491	0.0771769	0.123199	0.0486831	0.15445	0.15908	0.0825341	0.126323	0.147724	0.164449	0.243621	0.276503	0.192193	0.118548	0.11133	0.437965	0.293596	0.297738	0.436839	0.24336	0.421018	0.563998	0.396001	0.393428	0.392613	0.527474	0.502891	0.524397	0.489863	0.701886	0.650307	1	0.631391	0.60695	0.618911	0.790139
test26_cA_f9	0.0416141	0.0582395	0.0539416	0.0651344	0.115263	0.0696924	0.0704442	0.0585046	0.132984	0.108113	0.157683	0.0969255	0.155475	0.140161	0.148369	0.102972	0.198928	0.221385	0.201657	0.204376	0.132572	0.324787	0.283232	0.459951	0.402896	0.264606	0.437153	0.424291	0.409869	0.391866	0.553888	0.700234	0.48543	0.562861	0.498657	0.498434	0.640115	0.631391	1	0.688991	0.667417	0.819986
test32_cA_f9	0.0142555	0.0437512	0.0178413	0.0321392	0.103877	0.0499208	0.0458534	0.090165	0.059259	0.0584663	0.115135	0.0971781	0.0914321	0.0599738	0.141355	0.155009	0.284021	0.145894	0.164384	0.128538	0.190541	0.482077	0.296225	0.362566	0.274741	0.373663	0.587704	0.420774	0.356625	0.404837	0.412968	0.58512	0.50094	0.734474	0.480103	0.492909	0.63184	0.60695	0.688991	1	0.648659	0.773727
test39_cA_f9	0.0353375	0.0151802	0.0597998	0.0661436	0.123616	0.0861145	0.0755864	0.10904	0.0615657	0.12024	0.149859	0.153021	0.137982	0.136263	0.170734	0.127611	0.279083	0.245433	0.0983042	0.210281	0.156026	0.374001	0.341256	0.459284	0.305954	0.414189	0.481034	0.436838	0.443999	0.577856	0.397096	0.712327	0.538503	0.541199	0.539639	0.536202	0.659994	0.618911	0.667417	0.648659	1	0.780505
test01_protA	0.0174929	0.0233621	0.0338409	0.0285389	0.0660649	0.0290782	0.0437308	0.0729634	0.0770869	0.0592644	0.0931753	0.0896721	0.108283	0.0827942	0.0897533	0.123076	0.211352	0.181963	0.120517	0.153927	0.156405	0.408453	0.350416	0.403485	0.346182	0.29075	0.527043	0.501533	0.478711	0.481117	0.466297	0.641574	0.575012	0.648108	0.612819	0.599406	0.758033	0.790139	0.819986	0.773727	0.780505	1

## Sheet: CA3_MeanCorMatrix_test_init
item	test02_protB	test03_cB_f1	test24_cB_f1	test28_cB_f1	test34_cB_f1	test36_cB_f1	test07_cB_f2	test11_cB_f2	test15_cB_f2	test20_cB_f2	test29_cB_f2	test16_cB_f3	test17_cB_f3	test18_cB_f3	test21_cB_f3	test31_cB_f3	test14_cB_f4	test19_cB_f4	test33_cB_f4	test37_cB_f4	test40_cB_f4	test05_cA_f6	test22_cA_f6	test27_cA_f6	test35_cA_f6	test42_cA_f6	test09_cA_f7	test10_cA_f7	test12_cA_f7	test30_cA_f7	test41_cA_f7	test06_cA_f8	test08_cA_f8	test13_cA_f8	test25_cA_f8	test38_cA_f8	test04_cA_f9	test23_cA_f9	test26_cA_f9	test32_cA_f9	test39_cA_f9	test01_protA
test02_protB	1	0.686962	0.679174	0.677521	0.719037	0.680272	0.567329	0.525221	0.493109	0.468131	0.487033	0.363803	0.323948	0.414039	0.363115	0.325305	0.290127	0.231086	0.245306	0.245463	0.182542	0.0754867	0.0528273	0.0899329	0.102331	0.0638755	0.0186713	0.0220379	0.0101856	0.00313799	0.0204287	-0.0258245	0.00347442	0.00312253	-0.0399997	0.00217538	-0.0192997	-0.0286254	-0.0285407	-0.0224248	-0.0345069	-0.0288622
test03_cB_f1	0.686962	1	0.47275	0.459096	0.501296	0.505469	0.404516	0.330751	0.683117	0.344775	0.313827	0.218187	0.209498	0.292225	0.254624	0.466142	0.183276	0.121983	0.320511	0.137339	0.277137	0.118422	0.0923909	0.0289727	0.121554	0.0155047	0.0391578	0.063294	0.0469629	-0.0243704	0.0521184	-0.0307547	0.0189037	0.0147076	-0.0228236	0.00988229	-0.0160428	-0.0292338	-0.0207576	-0.0198921	-0.0273417	-0.0307196
test24_cB_f1	0.679174	0.47275	1	0.460516	0.502552	0.48376	0.370943	0.37374	0.348892	0.325339	0.72282	0.47382	0.200834	0.270793	0.279039	0.205217	0.179545	0.36913	0.406928	0.133463	0.109283	0.015556	-0.00529616	0.152934	0.182169	0.119324	-0.0189996	0.067105	0.0394512	0.0346774	-0.00699492	0.00785239	-0.0176969	0.00213585	-0.0123965	0.0382259	-0.0144972	-0.0174527	0.00694452	-0.0242255	-0.0253342	-0.0273201
test28_cB_f1	0.677521	0.459096	0.460516	1	0.507973	0.479879	0.391267	0.388496	0.307678	0.644868	0.333492	0.280375	0.426181	0.32455	0.209001	0.211357	0.236542	0.16478	0.11234	0.330909	0.270005	0.0621521	0.124617	0.18313	0.0226668	0.0939938	0.0507839	-0.00167345	0.0458203	0.0458407	0.0542156	0.0125065	0.0270604	0.0440433	-0.0120113	-0.0216194	-0.0171059	-0.0287162	-0.0205025	-0.0234011	-0.0132731	-0.0307011
test34_cB_f1	0.719037	0.501296	0.502552	0.507973	1	0.538547	0.3995	0.365208	0.34548	0.36168	0.653602	0.25727	0.215181	0.299151	0.2612	0.483789	0.400765	0.33603	0.164403	0.152229	0.120913	0.147377	0.0220983	0.135696	0.0633766	0.109672	0.0533289	0.085193	0.0378855	-0.0173685	0.0644736	-0.0146615	-0.014098	0.0322909	-0.00747031	0.0373839	-0.0198283	-0.00309028	-0.0264367	-0.0106518	-0.0248711	-0.0207002
test36_cB_f1	0.680272	0.505469	0.48376	0.479879	0.538547	1	0.36339	0.339814	0.347824	0.677353	0.378054	0.229004	0.189187	0.278597	0.473957	0.22784	0.158485	0.165778	0.339159	0.136581	0.29557	0.017129	0.100088	0.0409865	0.141792	0.119804	0.0414811	-0.00562654	-0.00526928	0.0382542	0.052838	-0.00630973	-0.00270672	-0.0115068	0.00467453	0.0362254	-0.0329042	-0.0176479	-0.0220039	-0.0184998	-0.0256773	-0.029865
test07_cB_f2	0.567329	0.404516	0.370943	0.391267	0.3995	0.36339	1	0.304167	0.274428	0.225335	0.23398	0.309291	0.327326	0.34876	0.352361	0.148884	0.222813	0.200519	0.210341	0.255471	0.0720047	0.185147	0.0348371	0.043032	0.10061	0.0317688	0.0603342	-0.00722932	0.00206653	-0.0105154	0.0019907	-0.00836402	0.0215324	0.0385863	-0.0329211	-0.00163364	-0.00974363	-0.00580733	-0.0236651	-0.0185921	-0.0210473	-0.0273658
test11_cB_f2	0.525221	0.330751	0.37374	0.388496	0.365208	0.339814	0.304167	1	0.244967	0.248096	0.24556	0.375863	0.180691	0.394635	0.357476	0.305985	0.511164	0.100019	0.0890284	0.216279	0.191947	0.201163	0.0560513	0.0664734	0.101489	0.0433321	-0.00117547	0.13274	0.0105444	0.11786	-0.00480233	-0.0184249	0.0706997	0.0374277	-0.0383117	0.075285	0.0481854	0.0243014	-0.0340705	-0.0056337	0.00169214	-0.0203255
test15_cB_f2	0.493109	0.683117	0.348892	0.307678	0.34548	0.347824	0.274428	0.244967	1	0.204088	0.229538	0.145313	0.30957	0.398965	0.19246	0.331064	0.111263	0.191585	0.234569	0.217962	0.154993	0.0631283	0.13614	0.0642477	0.180702	-0.00865473	0.00226075	0.124849	0.0822746	-0.00779199	0.104426	-0.0173277	0.04452	-0.0125038	-0.0120058	0.0430446	-0.00207278	-0.0190327	0.000537512	-0.0322281	-0.0241509	-0.0239251
test20_cB_f2	0.468131	0.344775	0.325339	0.644868	0.36168	0.677353	0.225335	0.248096	0.204088	1	0.250631	0.14662	0.261211	0.184033	0.334084	0.12034	0.108939	0.0772713	0.19193	0.186585	0.45035	0.00195483	0.204644	0.0929427	0.0476478	0.178434	0.0980023	-0.0245728	0.0188379	0.109394	0.120006	0.0638447	0.0479366	-0.00588262	0.0694514	-0.00217643	-0.00247785	-0.0265504	0.02122	0.00575144	0.0190523	-0.0126193
test29_cB_f2	0.487033	0.313827	0.72282	0.333492	0.653602	0.378054	0.23398	0.24556	0.229538	0.250631	1	0.342925	0.125313	0.179885	0.190702	0.310265	0.253596	0.539549	0.293526	0.0790372	0.0700323	0.0537922	-0.0154479	0.235753	0.132718	0.190429	0.00265887	0.171229	0.0956607	0.00582202	0.0211435	0.0669988	-0.018023	0.0708094	0.0466657	0.110414	-0.0200224	0.0496577	0.0571336	0.0189899	0.0134059	0.0143348
test16_cB_f3	0.363803	0.218187	0.47382	0.280375	0.25727	0.229004	0.309291	0.375863	0.145313	0.14662	0.342925	1	0.0772956	0.229381	0.0737182	0.197347	0.301922	0.336312	0.125897	0.0404253	0.117712	0.0713965	0.0774916	0.132671	0.0185096	0.0720025	0.0221206	0.207907	0.0418519	0.142099	-0.019923	-0.00788105	0.00862259	0.0738755	0.0634751	0.0234209	0.0474119	0.0665664	-0.0117607	0.0302522	0.0237218	0.0152784
test17_cB_f3	0.323948	0.209498	0.200834	0.426181	0.215181	0.189187	0.327326	0.180691	0.30957	0.261211	0.125313	0.0772956	1	0.307214	0.21637	0.0671599	0.0773586	0.108464	0.0930705	0.753982	0.0974852	0.0290925	0.140888	0.160405	0.143688	0.111301	0.0772457	0.00278324	0.211196	0.0845119	0.236325	0.143068	0.173997	0.0588888	0.020694	0.0243473	0.0968391	-0.0118422	0.0835412	0.00849404	0.0955369	0.0543861
test18_cB_f3	0.414039	0.292225	0.270793	0.32455	0.299151	0.278597	0.34876	0.394635	0.398965	0.184033	0.179885	0.229381	0.307214	1	0.237421	0.104956	0.328742	0.310906	0.0426059	0.432741	0.0368962	0.0824938	0.0851099	0.273776	0.162214	-0.016775	-0.0221031	0.155327	0.00609617	0.149216	0.0982836	0.089919	0.108738	0.00850509	-0.0243484	0.0304643	0.0612894	0.0372986	0.0447289	-0.0204971	0.0522978	0.0149393
test21_cB_f3	0.363115	0.254624	0.279039	0.209001	0.2612	0.473957	0.352361	0.357476	0.19246	0.334084	0.190702	0.0737182	0.21637	0.237421	1	0.0797741	0.12576	0.0319959	0.306577	0.283276	0.118747	0.11616	-0.00726381	-0.00354601	0.327518	0.0813288	0.0272467	-0.00720487	-0.0220184	0.0350107	0.152028	0.08458	0.0715708	0.00816415	-0.0357301	0.125628	0.032286	0.0528107	0.0508178	0.033426	0.0255798	0.000228831
test31_cB_f3	0.325305	0.466142	0.205217	0.211357	0.483789	0.22784	0.148884	0.305985	0.331064	0.12034	0.310265	0.197347	0.0671599	0.104956	0.0797741	1	0.362805	0.132799	0.139037	0.0166751	0.227348	0.31281	0.0841169	0.026398	0.0435366	0.0810911	0.150922	0.241978	0.170862	-0.00925878	0.0766526	-0.0350178	0.00817179	0.117517	0.0822621	0.117601	-0.0123007	0.0368353	-0.0100187	0.0375214	-0.0174314	0.0149268
test14_cB_f4	0.290127	0.183276	0.179545	0.236542	0.400765	0.158485	0.222813	0.511164	0.111263	0.108939	0.253596	0.301922	0.0773586	0.328742	0.12576	0.362805	1	0.235552	-0.000694905	0.092082	0.0838221	0.447868	0.0626264	0.194924	0.0216349	0.0471306	0.115157	0.315439	0.0280101	0.0789875	0.0214553	0.0457364	0.0422039	0.175416	0.0368626	0.0925043	0.0267357	0.128773	0.0246506	0.0876502	0.0962812	0.0676264
test19_cB_f4	0.231086	0.121983	0.36913	0.16478	0.33603	0.165778	0.200519	0.100019	0.191585	0.0772713	0.539549	0.336312	0.108464	0.310906	0.0319959	0.132799	0.235552	1	0.0951095	0.0822982	-0.0188572	0.0627745	0.00459494	0.458467	0.0767517	0.0718392	0.00084463	0.346911	0.104943	0.0810373	0.0235856	0.192615	-0.0174288	0.0847256	0.165283	0.108587	0.00200935	0.161942	0.139518	0.0353013	0.125125	0.0923257
test33_cB_f4	0.245306	0.320511	0.406928	0.11234	0.164403	0.339159	0.210341	0.0890284	0.234569	0.19193	0.293526	0.125897	0.0930705	0.0426059	0.306577	0.139037	-0.000694905	0.0951095	1	0.0379808	0.204153	0.0337452	0.058502	0.00838118	0.54172	0.151433	0.0686833	0.070636	0.0928132	0.0377477	0.110666	0.075529	0.0730349	0.0435766	0.103517	0.260818	0.150337	0.15836	0.169716	0.115413	0.0198713	0.0931426
test37_cB_f4	0.245463	0.137339	0.133463	0.330909	0.152229	0.136581	0.255471	0.216279	0.217962	0.186585	0.0790372	0.0404253	0.753982	0.432741	0.283276	0.0166751	0.092082	0.0822982	0.0379808	1	0.0355121	0.0567569	0.0862637	0.254298	0.224699	0.0596395	0.0457264	0.0311897	0.14904	0.1685	0.322741	0.23957	0.265688	0.0882528	-0.00319991	0.0637769	0.170974	0.030238	0.170896	0.0338631	0.170711	0.107884
test40_cB_f4	0.182542	0.277137	0.109283	0.270005	0.120913	0.29557	0.0720047	0.191947	0.154993	0.45035	0.0700323	0.117712	0.0974852	0.0368962	0.118747	0.227348	0.0838221	-0.0188572	0.204153	0.0355121	1	0.0367944	0.510292	0.00438786	0.0549264	0.199325	0.273543	0.00646817	0.078104	0.154791	0.144474	-0.00427163	0.249041	0.0161864	0.167626	0.0642306	0.150548	0.0198105	0.0224423	0.10511	0.0396178	0.0685876
test05_cA_f6	0.0754867	0.118422	0.015556	0.0621521	0.147377	0.017129	0.185147	0.201163	0.0631283	0.00195483	0.0537922	0.0713965	0.0290925	0.0824938	0.11616	0.31281	0.447868	0.0627745	0.0337452	0.0567569	0.0367944	1	0.0331191	0.0528953	0.0792434	0.0537328	0.311816	0.296177	0.149376	0.00668168	0.118991	0.0736778	0.172996	0.461809	0.0536019	0.214657	0.112682	0.29251	0.121357	0.259932	0.133985	0.18578
test22_cA_f6	0.0528273	0.0923909	-0.00529616	0.124617	0.0220983	0.100088	0.0348371	0.0560513	0.13614	0.204644	-0.0154479	0.0774916	0.140888	0.0851099	-0.00726381	0.0841169	0.0626264	0.00459494	0.058502	0.0862637	0.510292	0.0331191	1	0.072975	0.0572679	0.0873769	0.263622	0.0511379	0.0731988	0.324899	0.160493	0.0813675	0.462678	0.0521734	0.368334	0.0497917	0.328454	0.101942	0.120433	0.136977	0.155708	0.211579
test27_cA_f6	0.0899329	0.0289727	0.152934	0.18313	0.135696	0.0409865	0.043032	0.0664734	0.0642477	0.0929427	0.235753	0.132671	0.160405	0.273776	-0.00354601	0.026398	0.194924	0.458467	0.00838118	0.254298	0.00438786	0.0528953	0.072975	1	0.0956242	0.0912351	0.0137081	0.33957	0.198462	0.293442	0.130207	0.493754	0.0801637	0.268113	0.251971	0.0932101	0.159083	0.142862	0.365528	0.160492	0.362678	0.27024
test35_cA_f6	0.102331	0.121554	0.182169	0.0226668	0.0633766	0.141792	0.10061	0.101489	0.180702	0.0476478	0.132718	0.0185096	0.143688	0.162214	0.327518	0.0435366	0.0216349	0.0767517	0.54172	0.224699	0.0549264	0.0792434	0.0572679	0.0956242	1	0.0495921	0.0151524	0.156682	0.0887563	0.169223	0.297553	0.232287	0.233894	0.0552971	0.101911	0.45165	0.35523	0.324965	0.361223	0.157787	0.136597	0.235461
test42_cA_f6	0.0638755	0.0155047	0.119324	0.0939938	0.109672	0.119804	0.0317688	0.0433321	-0.00865473	0.178434	0.190429	0.0720025	0.111301	-0.016775	0.0813288	0.0810911	0.0471306	0.0718392	0.151433	0.0596395	0.199325	0.0537328	0.0873769	0.0912351	0.0495921	1	0.360845	0.0558984	0.349493	0.182343	0.16021	0.258	0.127912	0.229403	0.30043	0.258863	0.181112	0.192756	0.198381	0.375187	0.399829	0.308731
test09_cA_f7	0.0186713	0.0391578	-0.0189996	0.0507839	0.0533289	0.0414811	0.0603342	-0.00117547	0.00226075	0.0980023	0.00265887	0.0221206	0.0772457	-0.0221031	0.0272467	0.150922	0.115157	0.00084463	0.0686833	0.0457264	0.273543	0.311816	0.263622	0.0137081	0.0151524	0.360845	1	0.0769138	0.184903	0.0753859	0.295914	0.158204	0.342049	0.29181	0.318475	0.161833	0.213902	0.249755	0.221519	0.468829	0.286217	0.365588
test10_cA_f7	0.0220379	0.063294	0.067105	-0.00167345	0.085193	-0.00562654	-0.00722932	0.13274	0.124849	-0.0245728	0.171229	0.207907	0.00278324	0.155327	-0.00720487	0.241978	0.315439	0.346911	0.070636	0.0311897	0.00646817	0.296177	0.0511379	0.33957	0.156682	0.0558984	0.0769138	1	0.279223	0.192284	0.0894591	0.174995	0.076314	0.354321	0.313835	0.36265	0.184294	0.471151	0.255187	0.247828	0.251344	0.334195
test12_cA_f7	0.0101856	0.0469629	0.0394512	0.0458203	0.0378855	-0.00526928	0.00206653	0.0105444	0.0822746	0.0188379	0.0956607	0.0418519	0.211196	0.00609617	-0.0220184	0.170862	0.0280101	0.104943	0.0928132	0.14904	0.078104	0.149376	0.0731988	0.198462	0.0887563	0.349493	0.184903	0.279223	1	0.112663	0.229521	0.191428	0.140331	0.426983	0.309172	0.272935	0.231356	0.207415	0.249399	0.263788	0.277166	0.352194
test30_cA_f7	0.00313799	-0.0243704	0.0346774	0.0458407	-0.0173685	0.0382542	-0.0105154	0.11786	-0.00779199	0.109394	0.00582202	0.142099	0.0845119	0.149216	0.0350107	-0.00925878	0.0789875	0.0810373	0.0377477	0.1685	0.154791	0.00668168	0.324899	0.293442	0.169223	0.182343	0.0753859	0.192284	0.112663	1	0.101558	0.351051	0.35408	0.158469	0.346793	0.178662	0.540845	0.249258	0.271121	0.267781	0.478546	0.376026
test41_cA_f7	0.0204287	0.0521184	-0.00699492	0.0542156	0.0644736	0.052838	0.0019907	-0.00480233	0.104426	0.120006	0.0211435	-0.019923	0.236325	0.0982836	0.152028	0.0766526	0.0214553	0.0235856	0.110666	0.322741	0.144474	0.118991	0.160493	0.130207	0.297553	0.16021	0.295914	0.0894591	0.229521	0.101558	1	0.392952	0.369747	0.140994	0.195164	0.306973	0.259024	0.241629	0.518223	0.272423	0.274053	0.379394
test06_cA_f8	-0.0258245	-0.0307547	0.00785239	0.0125065	-0.0146615	-0.00630973	-0.00836402	-0.0184249	-0.0173277	0.0638447	0.0669988	-0.00788105	0.143068	0.089919	0.08458	-0.0350178	0.0457364	0.192615	0.075529	0.23957	-0.00427163	0.0736778	0.0813675	0.493754	0.232287	0.258	0.158204	0.174995	0.191428	0.351051	0.392952	1	0.261684	0.282729	0.324157	0.278125	0.388074	0.365213	0.747835	0.424077	0.716067	0.558753
test08_cA_f8	0.00347442	0.0189037	-0.0176969	0.0270604	-0.014098	-0.00270672	0.0215324	0.0706997	0.04452	0.0479366	-0.018023	0.00862259	0.173997	0.108738	0.0715708	0.00817179	0.0422039	-0.0174288	0.0730349	0.265688	0.249041	0.172996	0.462678	0.0801637	0.233894	0.127912	0.342049	0.076314	0.140331	0.35408	0.369747	0.261684	1	0.203896	0.17537	0.19467	0.695925	0.282451	0.339734	0.327399	0.349251	0.443567
test13_cA_f8	0.00312253	0.0147076	0.00213585	0.0440433	0.0322909	-0.0115068	0.0385863	0.0374277	-0.0125038	-0.00588262	0.0708094	0.0738755	0.0588888	0.00850509	0.00816415	0.117517	0.175416	0.0847256	0.0435766	0.0882528	0.0161864	0.461809	0.0521734	0.268113	0.0552971	0.229403	0.29181	0.354321	0.426983	0.158469	0.140994	0.282729	0.203896	1	0.250431	0.224955	0.318516	0.320079	0.364195	0.594348	0.394368	0.491531
test25_cA_f8	-0.0399997	-0.0228236	-0.0123965	-0.0120113	-0.00747031	0.00467453	-0.0329211	-0.0383117	-0.0120058	0.0694514	0.0466657	0.0634751	0.020694	-0.0243484	-0.0357301	0.0822621	0.0368626	0.165283	0.103517	-0.00319991	0.167626	0.0536019	0.368334	0.251971	0.101911	0.30043	0.318475	0.313835	0.309172	0.346793	0.195164	0.324157	0.17537	0.250431	1	0.314491	0.364903	0.435444	0.432595	0.443904	0.442078	0.592913
test38_cA_f8	0.00217538	0.00988229	0.0382259	-0.0216194	0.0373839	0.0362254	-0.00163364	0.075285	0.0430446	-0.00217643	0.110414	0.0234209	0.0243473	0.0304643	0.125628	0.117601	0.0925043	0.108587	0.260818	0.0637769	0.0642306	0.214657	0.0497917	0.0932101	0.45165	0.258863	0.161833	0.36265	0.272935	0.178662	0.306973	0.278125	0.19467	0.224955	0.314491	1	0.321828	0.718081	0.384983	0.414799	0.381332	0.523475
test04_cA_f9	-0.0192997	-0.0160428	-0.0144972	-0.0171059	-0.0198283	-0.0329042	-0.00974363	0.0481854	-0.00207278	-0.00247785	-0.0200224	0.0474119	0.0968391	0.0612894	0.032286	-0.0123007	0.0267357	0.00200935	0.150337	0.170974	0.150548	0.112682	0.328454	0.159083	0.35523	0.181112	0.213902	0.184294	0.231356	0.540845	0.259024	0.388074	0.695925	0.318516	0.364903	0.321828	1	0.45181	0.507237	0.512222	0.507939	0.659483
test23_cA_f9	-0.0286254	-0.0292338	-0.0174527	-0.0287162	-0.00309028	-0.0176479	-0.00580733	0.0243014	-0.0190327	-0.0265504	0.0496577	0.0665664	-0.0118422	0.0372986	0.0528107	0.0368353	0.128773	0.161942	0.15836	0.030238	0.0198105	0.29251	0.101942	0.142862	0.324965	0.192756	0.249755	0.471151	0.207415	0.249258	0.241629	0.365213	0.282451	0.320079	0.435444	0.718081	0.45181	1	0.505189	0.557788	0.506782	0.691084
test26_cA_f9	-0.0285407	-0.0207576	0.00694452	-0.0205025	-0.0264367	-0.0220039	-0.0236651	-0.0340705	0.000537512	0.02122	0.0571336	-0.0117607	0.0835412	0.0447289	0.0508178	-0.0100187	0.0246506	0.139518	0.169716	0.170896	0.0224423	0.121357	0.120433	0.365528	0.361223	0.198381	0.221519	0.255187	0.249399	0.271121	0.518223	0.747835	0.339734	0.364195	0.432595	0.384983	0.507237	0.505189	1	0.557862	0.550794	0.715072
test32_cA_f9	-0.0224248	-0.0198921	-0.0242255	-0.0234011	-0.0106518	-0.0184998	-0.0185921	-0.0056337	-0.0322281	0.00575144	0.0189899	0.0302522	0.00849404	-0.0204971	0.033426	0.0375214	0.0876502	0.0353013	0.115413	0.0338631	0.10511	0.259932	0.136977	0.160492	0.157787	0.375187	0.468829	0.247828	0.263788	0.267781	0.272423	0.424077	0.327399	0.594348	0.443904	0.414799	0.512222	0.557788	0.557862	1	0.578961	0.768766
test39_cA_f9	-0.0345069	-0.0273417	-0.0253342	-0.0132731	-0.0248711	-0.0256773	-0.0210473	0.00169214	-0.0241509	0.0190523	0.0134059	0.0237218	0.0955369	0.0522978	0.0255798	-0.0174314	0.0962812	0.125125	0.0198713	0.170711	0.0396178	0.133985	0.155708	0.362678	0.136597	0.399829	0.286217	0.251344	0.277166	0.478546	0.274053	0.716067	0.349251	0.394368	0.442078	0.381332	0.507939	0.506782	0.550794	0.578961	1	0.76176
test01_protA	-0.0288622	-0.0307196	-0.0273201	-0.0307011	-0.0207002	-0.029865	-0.0273658	-0.0203255	-0.0239251	-0.0126193	0.0143348	0.0152784	0.0543861	0.0149393	0.000228831	0.0149268	0.0676264	0.0923257	0.0931426	0.107884	0.0685876	0.18578	0.211579	0.27024	0.235461	0.308731	0.365588	0.334195	0.352194	0.376026	0.379394	0.558753	0.443567	0.491531	0.592913	0.523475	0.659483	0.691084	0.715072	0.768766	0.76176	1

## Sheet: CA3_MeanCorMatrix_test_set
item	test02_protB	test03_cB_f1	test24_cB_f1	test28_cB_f1	test34_cB_f1	test36_cB_f1	test07_cB_f2	test11_cB_f2	test15_cB_f2	test20_cB_f2	test29_cB_f2	test16_cB_f3	test17_cB_f3	test18_cB_f3	test21_cB_f3	test31_cB_f3	test14_cB_f4	test19_cB_f4	test33_cB_f4	test37_cB_f4	test40_cB_f4	test05_cA_f6	test22_cA_f6	test27_cA_f6	test35_cA_f6	test42_cA_f6	test09_cA_f7	test10_cA_f7	test12_cA_f7	test30_cA_f7	test41_cA_f7	test06_cA_f8	test08_cA_f8	test13_cA_f8	test25_cA_f8	test38_cA_f8	test04_cA_f9	test23_cA_f9	test26_cA_f9	test32_cA_f9	test39_cA_f9	test01_protA
test02_protB	1	0.681347	0.756042	0.683336	0.63326	0.717982	0.523328	0.547981	0.549906	0.494869	0.465706	0.476508	0.361757	0.414876	0.354763	0.320335	0.259967	0.268649	0.263789	0.228338	0.24779	0.108177	0.0442447	0.0652826	0.0681605	0.199945	0.0619347	0.0658161	0.0529248	0.055485	0.0627582	0.0216698	0.0215899	-0.00600491	0.0126981	-0.0101248	-0.00719793	-0.0251496	0.00541064	0.00689556	0.0041663	-0.0218484
test03_cB_f1	0.681347	1	0.543633	0.438027	0.426003	0.541794	0.396264	0.462675	0.712867	0.315595	0.293127	0.3517	0.196093	0.381053	0.251396	0.421973	0.261328	0.206595	0.378693	0.162855	0.330049	0.159749	0.089637	0.0639786	0.114509	0.105611	0.0521033	0.117966	0.110417	0.0447855	0.0548978	0.0235532	0.0348799	0.0429714	0.0246857	0.0232664	0.00735156	0.00765555	0.0149237	0.0258341	-0.0106465	-0.0196466
test24_cB_f1	0.756042	0.543633	1	0.570081	0.498999	0.610967	0.429354	0.402004	0.479154	0.45448	0.578192	0.53442	0.303967	0.319581	0.267915	0.292176	0.178198	0.266605	0.388117	0.208866	0.228859	0.0800556	0.0353486	0.0739877	0.179426	0.227694	0.0233557	0.0882325	0.136308	0.0890479	0.0785997	0.0153711	0.00317366	0.010652	0.0279394	0.0781896	0.0141163	0.0252996	0.016197	-0.00419963	0.0185956	-0.00925077
test28_cB_f1	0.683336	0.438027	0.570081	1	0.524519	0.493613	0.430359	0.386398	0.374572	0.609189	0.372348	0.34933	0.489416	0.303759	0.316252	0.286272	0.206701	0.193378	0.205622	0.335756	0.342544	0.104748	0.135993	0.138852	0.0369301	0.215902	0.0969773	0.0491026	0.0640196	0.149979	0.135348	0.0353499	0.0660192	0.0245036	0.0289318	0.00628693	0.0348922	-0.024699	0.0162579	0.0115347	-0.00631924	-0.0203432
test34_cB_f1	0.63326	0.426003	0.498999	0.524519	1	0.553306	0.406131	0.366547	0.388703	0.400278	0.701458	0.381265	0.305821	0.30845	0.284383	0.445447	0.401261	0.394239	0.211514	0.199055	0.236122	0.218358	0.0570348	0.153953	0.063305	0.277856	0.135169	0.141704	0.12997	0.0743084	0.13601	0.0969433	0.0521702	0.0905389	0.0585858	0.0453329	0.0303987	0.0370112	0.0796814	0.0937512	0.0631549	0.0196047
test36_cB_f1	0.717982	0.541794	0.610967	0.493613	0.553306	1	0.460261	0.421188	0.401909	0.5962	0.40031	0.416177	0.291102	0.336523	0.446901	0.251926	0.24738	0.245816	0.345293	0.171066	0.216479	0.103771	0.083172	0.0746444	0.100349	0.252225	0.0867062	0.065143	0.0754404	0.114662	0.0963431	0.0750871	0.0688832	-0.00103475	0.033219	0.0225913	0.0454703	0.0103106	0.0366247	0.038358	0.0615699	0.00922398
test07_cB_f2	0.523328	0.396264	0.429354	0.430359	0.406131	0.460261	1	0.331002	0.343999	0.305781	0.332803	0.490467	0.439393	0.426977	0.350569	0.202444	0.249022	0.294891	0.225306	0.300158	0.125261	0.219706	0.100076	0.123856	0.0632215	0.151405	0.125619	0.0978085	0.102848	0.0768239	0.0920083	0.0626583	0.104755	0.082529	0.0398171	0.0165062	0.0240528	0.0275525	0.0460328	0.0380064	0.0447634	0.0106621
test11_cB_f2	0.547981	0.462675	0.402004	0.386398	0.366547	0.421188	0.331002	1	0.417218	0.278439	0.274985	0.460041	0.210864	0.501771	0.34306	0.369882	0.430178	0.189293	0.123677	0.292165	0.273037	0.168529	0.132987	0.134899	0.121165	0.15462	0.0842768	0.198332	0.084258	0.165322	0.0598453	0.0453068	0.116729	0.079612	0.0484208	0.103971	0.104167	0.0329347	0.0568983	0.0620829	0.0785049	0.0458572
test15_cB_f2	0.549906	0.712867	0.479154	0.374572	0.388703	0.401909	0.343999	0.417218	1	0.25192	0.26582	0.330221	0.284971	0.433499	0.249286	0.350579	0.242906	0.260987	0.3798	0.232038	0.256955	0.122168	0.155855	0.123732	0.235112	0.0711553	0.00763533	0.210269	0.179195	0.129256	0.10076	0.0566627	0.100373	0.079673	0.0758321	0.0857237	0.0811423	0.0396639	0.0637726	0.0128882	0.0283085	0.0114196
test20_cB_f2	0.494869	0.315595	0.45448	0.609189	0.400278	0.5962	0.305781	0.278439	0.25192	1	0.375165	0.356746	0.47609	0.291448	0.341669	0.250263	0.166749	0.218518	0.259977	0.293927	0.430991	0.0785271	0.217059	0.176475	0.103652	0.337409	0.161481	0.0688605	0.125478	0.248237	0.173355	0.11342	0.133944	0.0382888	0.107305	0.0548273	0.107101	-0.00597802	0.0824073	0.0326751	0.0925063	0.0224825
test29_cB_f2	0.465706	0.293127	0.578192	0.372348	0.701458	0.40031	0.332803	0.274985	0.26582	0.375165	1	0.40844	0.302943	0.262786	0.210021	0.360152	0.285971	0.457871	0.304227	0.227959	0.17036	0.14768	0.0268935	0.21533	0.201081	0.378777	0.127534	0.180057	0.226366	0.111147	0.154391	0.115264	0.0564836	0.11172	0.101127	0.151965	0.0562038	0.100125	0.129847	0.0767038	0.0940745	0.0364526
test16_cB_f3	0.476508	0.3517	0.53442	0.34933	0.381265	0.416177	0.490467	0.460041	0.330221	0.356746	0.40844	1	0.280563	0.41991	0.22876	0.333537	0.296993	0.413013	0.190392	0.190447	0.248219	0.154361	0.18113	0.190781	0.12094	0.230153	0.134869	0.228369	0.167548	0.182016	0.0333006	0.0771598	0.127692	0.0902314	0.12963	0.0984408	0.0922069	0.0731434	0.0860795	0.034784	0.0989849	0.0391713
test17_cB_f3	0.361757	0.196093	0.303967	0.489416	0.305821	0.291102	0.439393	0.210864	0.284971	0.47609	0.302943	0.280563	1	0.254543	0.289217	0.202486	0.10507	0.222201	0.165805	0.584399	0.262355	0.126894	0.220032	0.186934	0.113452	0.284215	0.181488	0.0834908	0.234039	0.22458	0.261224	0.148116	0.224763	0.131083	0.0961116	0.0948492	0.133478	0.0554599	0.107654	0.0691331	0.105261	0.0739041
test18_cB_f3	0.414876	0.381053	0.319581	0.303759	0.30845	0.336523	0.426977	0.501771	0.433499	0.291448	0.262786	0.41991	0.254543	1	0.238861	0.16604	0.428757	0.385659	0.0991863	0.338113	0.13894	0.20558	0.127368	0.331375	0.166075	0.0561212	0.0368132	0.316239	0.0758449	0.224787	0.0855721	0.128741	0.139768	0.13561	0.0547299	0.10074	0.131457	0.0707189	0.111799	0.0583721	0.109902	0.0560248
test21_cB_f3	0.354763	0.251396	0.267915	0.316252	0.284383	0.446901	0.350569	0.34306	0.249286	0.341669	0.210021	0.22876	0.289217	0.238861	1	0.121124	0.235816	0.134021	0.316928	0.388888	0.145678	0.229248	0.0657693	0.115693	0.244808	0.271031	0.154027	0.104769	0.0605844	0.177461	0.240005	0.167307	0.268464	0.0829542	0.0388919	0.125854	0.119329	0.0902161	0.114102	0.131644	0.143497	0.047073
test31_cB_f3	0.320335	0.421973	0.292176	0.286272	0.445447	0.251926	0.202444	0.369882	0.350579	0.250263	0.360152	0.333537	0.202486	0.16604	0.121124	1	0.364524	0.223276	0.195293	0.191482	0.437388	0.269547	0.202019	0.0866635	0.0916567	0.242259	0.222205	0.187179	0.258045	0.0974587	0.148273	0.0155647	0.0970734	0.131069	0.135039	0.154953	0.0469055	0.0863375	0.0314041	0.0878279	0.0663318	0.0554812
test14_cB_f4	0.259967	0.261328	0.178198	0.206701	0.401261	0.24738	0.249022	0.430178	0.242906	0.166749	0.285971	0.296993	0.10507	0.428757	0.235816	0.364524	1	0.301418	0.0837452	0.170793	0.215599	0.527585	0.167127	0.341697	0.0725027	0.202921	0.208567	0.340545	0.125247	0.182034	0.136436	0.179316	0.173534	0.344884	0.110255	0.17033	0.125536	0.187862	0.164511	0.255607	0.213751	0.150801
test19_cB_f4	0.268649	0.206595	0.266605	0.193378	0.394239	0.245816	0.294891	0.189293	0.260987	0.218518	0.457871	0.413013	0.222201	0.385659	0.134021	0.223276	0.301418	1	0.139411	0.164615	0.0652611	0.200447	0.0342242	0.397966	0.150573	0.17914	0.123646	0.341058	0.2363	0.197544	0.0888483	0.256307	0.0983224	0.176307	0.198887	0.145569	0.113965	0.187881	0.191887	0.0722325	0.142477	0.117943
test33_cB_f4	0.263789	0.378693	0.388117	0.205622	0.211514	0.345293	0.225306	0.123677	0.3798	0.259977	0.304227	0.190392	0.165805	0.0991863	0.316928	0.195293	0.0837452	0.139411	1	0.180622	0.221742	0.114459	0.0786165	0.10241	0.445256	0.254984	0.104838	0.102197	0.224334	0.0663548	0.248306	0.12337	0.11972	0.121	0.0736965	0.225594	0.108855	0.129334	0.154426	0.131421	0.0704789	0.0577545
test37_cB_f4	0.228338	0.162855	0.208866	0.335756	0.199055	0.171066	0.300158	0.292165	0.232038	0.293927	0.227959	0.190447	0.584399	0.338113	0.388888	0.191482	0.170793	0.164615	0.180622	1	0.207787	0.171691	0.157236	0.27783	0.258206	0.222442	0.149508	0.158114	0.21856	0.280547	0.357424	0.211178	0.325773	0.191996	0.0935594	0.157978	0.189532	0.0650922	0.164831	0.110607	0.179631	0.119779
test40_cB_f4	0.24779	0.330049	0.228859	0.342544	0.236122	0.216479	0.125261	0.273037	0.256955	0.430991	0.17036	0.248219	0.262355	0.13894	0.145678	0.437388	0.215599	0.0652611	0.221742	0.207787	1	0.164407	0.438513	0.0910827	0.116518	0.20564	0.29974	0.0925035	0.189262	0.217891	0.237991	0.0479327	0.226655	0.104465	0.224271	0.108595	0.192044	0.0524635	0.0864393	0.134094	0.0913482	0.0981086
test05_cA_f6	0.108177	0.159749	0.0800556	0.104748	0.218358	0.103771	0.219706	0.168529	0.122168	0.0785271	0.14768	0.154361	0.126894	0.20558	0.229248	0.269547	0.527585	0.200447	0.114459	0.171691	0.164407	1	0.171041	0.246663	0.190909	0.192119	0.375579	0.348842	0.196742	0.125878	0.241695	0.222625	0.29138	0.509211	0.139208	0.305454	0.192721	0.333069	0.237746	0.433157	0.275657	0.29932
test22_cA_f6	0.0442447	0.089637	0.0353486	0.135993	0.0570348	0.083172	0.100076	0.132987	0.155855	0.217059	0.0268935	0.18113	0.220032	0.127368	0.0657693	0.202019	0.167127	0.0342242	0.0786165	0.157236	0.438513	0.171041	1	0.157488	0.14157	0.156913	0.447425	0.179006	0.231558	0.398484	0.2064	0.179985	0.459895	0.189984	0.449798	0.200401	0.388978	0.210348	0.22467	0.231231	0.290085	0.2923
test27_cA_f6	0.0652826	0.0639786	0.0739877	0.138852	0.153953	0.0746444	0.123856	0.134899	0.123732	0.176475	0.21533	0.190781	0.186934	0.331375	0.115693	0.0866635	0.341697	0.397966	0.10241	0.27783	0.0910827	0.246663	0.157488	1	0.176766	0.161184	0.15699	0.436215	0.241246	0.441484	0.208045	0.506523	0.185492	0.377359	0.28987	0.208077	0.287145	0.235843	0.409671	0.282776	0.392572	0.323885
test35_cA_f6	0.0681605	0.114509	0.179426	0.0369301	0.063305	0.100349	0.0632215	0.121165	0.235112	0.103652	0.201081	0.12094	0.113452	0.166075	0.244808	0.0916567	0.0725027	0.150573	0.445256	0.258206	0.116518	0.190909	0.14157	0.176766	1	0.15991	0.119129	0.229028	0.333435	0.240137	0.393458	0.270853	0.291531	0.233569	0.188433	0.545548	0.347945	0.374361	0.35047	0.226652	0.277393	0.294185
test42_cA_f6	0.199945	0.105611	0.227694	0.215902	0.277856	0.252225	0.151405	0.15462	0.0711553	0.337409	0.378777	0.230153	0.284215	0.0561212	0.271031	0.242259	0.202921	0.17914	0.254984	0.222442	0.20564	0.192119	0.156913	0.161184	0.15991	1	0.394642	0.0944689	0.363988	0.196387	0.206894	0.223161	0.193939	0.259099	0.22897	0.242092	0.167455	0.146695	0.160574	0.301727	0.300609	0.175385
test09_cA_f7	0.0619347	0.0521033	0.0233557	0.0969773	0.135169	0.0867062	0.125619	0.0842768	0.00763533	0.161481	0.127534	0.134869	0.181488	0.0368132	0.154027	0.222205	0.208567	0.123646	0.104838	0.149508	0.29974	0.375579	0.447425	0.15699	0.119129	0.394642	1	0.140533	0.266902	0.234047	0.338971	0.316258	0.524023	0.362175	0.432257	0.219763	0.389163	0.329352	0.318161	0.504803	0.383383	0.422034
test10_cA_f7	0.0658161	0.117966	0.0882325	0.0491026	0.141704	0.065143	0.0978085	0.198332	0.210269	0.0688605	0.180057	0.228369	0.0834908	0.316239	0.104769	0.187179	0.340545	0.341058	0.102197	0.158114	0.0925035	0.348842	0.179006	0.436215	0.229028	0.0944689	0.140533	1	0.283973	0.418382	0.22178	0.318616	0.286899	0.428427	0.38832	0.4401	0.420375	0.476256	0.380716	0.355757	0.405264	0.441572
test12_cA_f7	0.0529248	0.110417	0.136308	0.0640196	0.12997	0.0754404	0.102848	0.084258	0.179195	0.125478	0.226366	0.167548	0.234039	0.0758449	0.0605844	0.258045	0.125247	0.2363	0.224334	0.21856	0.189262	0.196742	0.231558	0.241246	0.333435	0.363988	0.266902	0.283973	1	0.278588	0.30512	0.229471	0.253603	0.402757	0.387324	0.474213	0.324545	0.284179	0.308172	0.248592	0.372633	0.38841
test30_cA_f7	0.055485	0.0447855	0.0890479	0.149979	0.0743084	0.114662	0.0768239	0.165322	0.129256	0.248237	0.111147	0.182016	0.22458	0.224787	0.177461	0.0974587	0.182034	0.197544	0.0663548	0.280547	0.217891	0.125878	0.398484	0.441484	0.240137	0.196387	0.234047	0.418382	0.278588	1	0.237344	0.389627	0.425675	0.314878	0.454517	0.36702	0.565851	0.360973	0.34691	0.349317	0.518908	0.452525
test41_cA_f7	0.0627582	0.0548978	0.0785997	0.135348	0.13601	0.0963431	0.0920083	0.0598453	0.10076	0.173355	0.154391	0.0333006	0.261224	0.0855721	0.240005	0.148273	0.136436	0.0888483	0.248306	0.357424	0.237991	0.241695	0.2064	0.208045	0.393458	0.206894	0.338971	0.22178	0.30512	0.237344	1	0.349566	0.421892	0.280159	0.208412	0.410405	0.331685	0.317887	0.490019	0.343778	0.328843	0.392548
test06_cA_f8	0.0216698	0.0235532	0.0153711	0.0353499	0.0969433	0.0750871	0.0626583	0.0453068	0.0566627	0.11342	0.115264	0.0771598	0.148116	0.128741	0.167307	0.0155647	0.179316	0.256307	0.12337	0.211178	0.0479327	0.222625	0.179985	0.506523	0.270853	0.223161	0.316258	0.318616	0.229471	0.389627	0.349566	1	0.384942	0.407349	0.353226	0.372476	0.493008	0.479654	0.660666	0.513467	0.673689	0.602149
test08_cA_f8	0.0215899	0.0348799	0.00317366	0.0660192	0.0521702	0.0688832	0.104755	0.116729	0.100373	0.133944	0.0564836	0.127692	0.224763	0.139768	0.268464	0.0970734	0.173534	0.0983224	0.11972	0.325773	0.226655	0.29138	0.459895	0.185492	0.291531	0.193939	0.524023	0.286899	0.253603	0.425675	0.421892	0.384942	1	0.317694	0.357596	0.361102	0.683277	0.424136	0.428203	0.440781	0.491103	0.51761
test13_cA_f8	-0.00600491	0.0429714	0.010652	0.0245036	0.0905389	-0.00103475	0.082529	0.079612	0.079673	0.0382888	0.11172	0.0902314	0.131083	0.13561	0.0829542	0.131069	0.344884	0.176307	0.121	0.191996	0.104465	0.509211	0.189984	0.377359	0.233569	0.259099	0.362175	0.428427	0.402757	0.314878	0.280159	0.407349	0.317694	1	0.340744	0.383593	0.424139	0.406269	0.45205	0.635393	0.459198	0.535789
test25_cA_f8	0.0126981	0.0246857	0.0279394	0.0289318	0.0585858	0.033219	0.0398171	0.0484208	0.0758321	0.107305	0.101127	0.12963	0.0961116	0.0547299	0.0388919	0.135039	0.110255	0.198887	0.0736965	0.0935594	0.224271	0.139208	0.449798	0.28987	0.188433	0.22897	0.432257	0.38832	0.387324	0.454517	0.208412	0.353226	0.357596	0.340744	1	0.354259	0.471906	0.454681	0.398041	0.383372	0.476111	0.551716
test38_cA_f8	-0.0101248	0.0232664	0.0781896	0.00628693	0.0453329	0.0225913	0.0165062	0.103971	0.0857237	0.0548273	0.151965	0.0984408	0.0948492	0.10074	0.125854	0.154953	0.17033	0.145569	0.225594	0.157978	0.108595	0.305454	0.200401	0.208077	0.545548	0.242092	0.219763	0.4401	0.474213	0.36702	0.410405	0.372476	0.361102	0.383593	0.354259	1	0.506619	0.666642	0.451553	0.417957	0.492499	0.544797
test04_cA_f9	-0.00719793	0.00735156	0.0141163	0.0348922	0.0303987	0.0454703	0.0240528	0.104167	0.0811423	0.107101	0.0562038	0.0922069	0.133478	0.131457	0.119329	0.0469055	0.125536	0.113965	0.108855	0.189532	0.192044	0.192721	0.388978	0.287145	0.347945	0.167455	0.389163	0.420375	0.324545	0.565851	0.331685	0.493008	0.683277	0.424139	0.471906	0.506619	1	0.564645	0.577187	0.551122	0.617976	0.706041
test23_cA_f9	-0.0251496	0.00765555	0.0252996	-0.024699	0.0370112	0.0103106	0.0275525	0.0329347	0.0396639	-0.00597802	0.100125	0.0731434	0.0554599	0.0707189	0.0902161	0.0863375	0.187862	0.187881	0.129334	0.0650922	0.0524635	0.333069	0.210348	0.235843	0.374361	0.146695	0.329352	0.476256	0.284179	0.360973	0.317887	0.479654	0.424136	0.406269	0.454681	0.666642	0.564645	1	0.544693	0.519939	0.52482	0.720549
test26_cA_f9	0.00541064	0.0149237	0.016197	0.0162579	0.0796814	0.0366247	0.0460328	0.0568983	0.0637726	0.0824073	0.129847	0.0860795	0.107654	0.111799	0.114102	0.0314041	0.164511	0.191887	0.154426	0.164831	0.0864393	0.237746	0.22467	0.409671	0.35047	0.160574	0.318161	0.380716	0.308172	0.34691	0.490019	0.660666	0.428203	0.45205	0.398041	0.451553	0.577187	0.544693	1	0.596137	0.626649	0.747041
test32_cA_f9	0.00689556	0.0258341	-0.00419963	0.0115347	0.0937512	0.038358	0.0380064	0.0620829	0.0128882	0.0326751	0.0767038	0.034784	0.0691331	0.0583721	0.131644	0.0878279	0.255607	0.0722325	0.131421	0.110607	0.134094	0.433157	0.231231	0.282776	0.226652	0.301727	0.504803	0.355757	0.248592	0.349317	0.343778	0.513467	0.440781	0.635393	0.383372	0.417957	0.551122	0.519939	0.596137	1	0.592757	0.711049
test39_cA_f9	0.0041663	-0.0106465	0.0185956	-0.00631924	0.0631549	0.0615699	0.0447634	0.0785049	0.0283085	0.0925063	0.0940745	0.0989849	0.105261	0.109902	0.143497	0.0663318	0.213751	0.142477	0.0704789	0.179631	0.0913482	0.275657	0.290085	0.392572	0.277393	0.300609	0.383383	0.405264	0.372633	0.518908	0.328843	0.673689	0.491103	0.459198	0.476111	0.492499	0.617976	0.52482	0.626649	0.592757	1	0.743069
test01_protA	-0.0218484	-0.0196466	-0.00925077	-0.0203432	0.0196047	0.00922398	0.0106621	0.0458572	0.0114196	0.0224825	0.0364526	0.0391713	0.0739041	0.0560248	0.047073	0.0554812	0.150801	0.117943	0.0577545	0.119779	0.0981086	0.29932	0.2923	0.323885	0.294185	0.175385	0.422034	0.441572	0.38841	0.452525	0.392548	0.602149	0.51761	0.535789	0.551716	0.544797	0.706041	0.720549	0.747041	0.711049	0.743069	1

## Sheet: CA1_MeanCorMatrix_test_init
item	test02_protB	test03_cB_f1	test24_cB_f1	test28_cB_f1	test34_cB_f1	test36_cB_f1	test07_cB_f2	test11_cB_f2	test15_cB_f2	test20_cB_f2	test29_cB_f2	test16_cB_f3	test17_cB_f3	test18_cB_f3	test21_cB_f3	test31_cB_f3	test14_cB_f4	test19_cB_f4	test33_cB_f4	test37_cB_f4	test40_cB_f4	test05_cA_f6	test22_cA_f6	test27_cA_f6	test35_cA_f6	test42_cA_f6	test09_cA_f7	test10_cA_f7	test12_cA_f7	test30_cA_f7	test41_cA_f7	test06_cA_f8	test08_cA_f8	test13_cA_f8	test25_cA_f8	test38_cA_f8	test04_cA_f9	test23_cA_f9	test26_cA_f9	test32_cA_f9	test39_cA_f9	test01_protA
test02_protB	1	0.819682	0.82548	0.820772	0.826513	0.814458	0.726709	0.721587	0.707479	0.699526	0.700064	0.619623	0.596682	0.632883	0.627211	0.611689	0.551498	0.521371	0.530117	0.52699	0.505041	0.400093	0.373539	0.385017	0.391477	0.353777	0.315665	0.316943	0.304424	0.310438	0.305834	0.268378	0.270498	0.267803	0.247625	0.280919	0.231638	0.236507	0.220413	0.218384	0.229837	0.185133
test03_cB_f1	0.819682	1	0.717548	0.695342	0.707252	0.71828	0.638444	0.616332	0.806915	0.614929	0.612514	0.548595	0.519238	0.548195	0.550788	0.679451	0.474957	0.455547	0.59611	0.447078	0.558804	0.436708	0.423958	0.333613	0.430615	0.32286	0.343264	0.367684	0.347544	0.276382	0.339476	0.238884	0.305573	0.300651	0.293318	0.315606	0.26424	0.277271	0.251863	0.2484	0.205482	0.218255
test24_cB_f1	0.82548	0.717548	1	0.708178	0.730348	0.718163	0.631085	0.64892	0.641745	0.617262	0.820465	0.664091	0.5224	0.565459	0.574905	0.541268	0.49031	0.597868	0.613962	0.468619	0.44695	0.350143	0.320817	0.440462	0.463442	0.412453	0.278745	0.372399	0.352272	0.356861	0.287928	0.316797	0.240898	0.302947	0.298025	0.337827	0.267751	0.285738	0.272244	0.254282	0.277419	0.226127
test28_cB_f1	0.820772	0.695342	0.708178	1	0.712216	0.713664	0.633092	0.63968	0.606681	0.807545	0.606517	0.550972	0.653018	0.575202	0.543024	0.535052	0.505785	0.464624	0.453142	0.575253	0.561607	0.355366	0.433694	0.447005	0.330815	0.403958	0.348125	0.276619	0.341436	0.368835	0.343617	0.312843	0.311649	0.312898	0.289326	0.243284	0.266929	0.201982	0.256249	0.255005	0.272865	0.223199
test34_cB_f1	0.826513	0.707252	0.730348	0.712216	1	0.73002	0.641074	0.640465	0.623732	0.629403	0.796181	0.546746	0.534455	0.569797	0.565833	0.679906	0.616722	0.59952	0.490587	0.479095	0.445561	0.448276	0.331813	0.438757	0.369672	0.418779	0.361159	0.371117	0.354889	0.285502	0.360907	0.323338	0.246506	0.308239	0.293712	0.335269	0.217139	0.296528	0.270061	0.265157	0.277426	0.231582
test36_cB_f1	0.814458	0.71828	0.718163	0.713664	0.73002	1	0.623421	0.649834	0.626791	0.799184	0.637185	0.537083	0.528283	0.549407	0.696824	0.547815	0.487378	0.464448	0.607031	0.468145	0.582501	0.350386	0.415313	0.343268	0.447205	0.417619	0.35645	0.280309	0.279151	0.358291	0.362149	0.314491	0.306966	0.234836	0.299445	0.336479	0.267151	0.281539	0.263358	0.260801	0.26881	0.224862
test07_cB_f2	0.726709	0.638444	0.631085	0.633092	0.641074	0.623421	1	0.569991	0.561232	0.542514	0.550651	0.596984	0.588675	0.617889	0.610305	0.477185	0.534962	0.503922	0.497888	0.51795	0.384785	0.50505	0.36238	0.376577	0.384671	0.341207	0.395446	0.310259	0.295805	0.303992	0.307631	0.341558	0.352858	0.346798	0.240986	0.27015	0.298346	0.298323	0.289689	0.280413	0.289886	0.24058
test11_cB_f2	0.721587	0.616332	0.64892	0.63968	0.640465	0.649834	0.569991	1	0.560991	0.564041	0.560732	0.616604	0.485302	0.616192	0.629359	0.593962	0.701618	0.419311	0.429519	0.524694	0.508966	0.500428	0.374268	0.389356	0.399666	0.369432	0.320113	0.405877	0.300936	0.414566	0.30541	0.282379	0.347623	0.344703	0.25803	0.35401	0.308064	0.305853	0.230395	0.295356	0.31702	0.255207
test15_cB_f2	0.707479	0.806915	0.641745	0.606681	0.623732	0.626791	0.561232	0.560991	1	0.536187	0.555361	0.494796	0.577795	0.608782	0.495936	0.618394	0.434946	0.510632	0.534023	0.508761	0.501855	0.405544	0.471249	0.376993	0.485227	0.302295	0.316402	0.43228	0.407571	0.321109	0.388327	0.278769	0.347988	0.279634	0.347298	0.369738	0.307724	0.316215	0.293963	0.233127	0.251498	0.260893
test20_cB_f2	0.699526	0.614929	0.617262	0.807545	0.629403	0.799184	0.542514	0.564041	0.536187	1	0.550127	0.465423	0.583341	0.48741	0.601876	0.476729	0.437309	0.410725	0.518771	0.509314	0.660374	0.312562	0.4886	0.403432	0.385344	0.483924	0.41074	0.254461	0.324514	0.430978	0.411703	0.374185	0.361747	0.281375	0.362335	0.298427	0.318627	0.256985	0.316246	0.315054	0.329194	0.28022
test29_cB_f2	0.700064	0.612514	0.820465	0.606517	0.796181	0.637185	0.550651	0.560732	0.555361	0.550127	1	0.583683	0.462782	0.498198	0.510182	0.580967	0.529306	0.692634	0.562618	0.416648	0.390343	0.384925	0.289485	0.498956	0.425418	0.46727	0.326377	0.430137	0.406705	0.331264	0.337989	0.373037	0.220122	0.346674	0.355023	0.392329	0.259534	0.349164	0.324829	0.304903	0.321575	0.280878
test16_cB_f3	0.619623	0.548595	0.664091	0.550972	0.546746	0.537083	0.596984	0.616604	0.494796	0.465423	0.583683	1	0.410197	0.537861	0.418124	0.5247	0.598729	0.564106	0.444429	0.362206	0.446207	0.447522	0.431359	0.437572	0.340262	0.39437	0.358127	0.486896	0.352837	0.461707	0.211578	0.316657	0.330586	0.404851	0.388387	0.314603	0.358911	0.370554	0.274272	0.340877	0.356285	0.305513
test17_cB_f3	0.596682	0.519238	0.5224	0.653018	0.534455	0.528283	0.588675	0.485302	0.577795	0.583341	0.462782	0.410197	1	0.548253	0.531145	0.412954	0.377403	0.445487	0.43678	0.800377	0.438149	0.362669	0.444896	0.447525	0.440767	0.43587	0.392646	0.286899	0.485745	0.399892	0.496243	0.436702	0.449623	0.341748	0.331131	0.354639	0.397863	0.309055	0.381941	0.292938	0.39282	0.344328
test18_cB_f3	0.632883	0.548195	0.565459	0.575202	0.569797	0.549407	0.617889	0.616192	0.608782	0.48741	0.498198	0.537861	0.548253	1	0.539231	0.417506	0.59283	0.583549	0.350027	0.630107	0.338912	0.446268	0.405208	0.556278	0.442132	0.261736	0.292513	0.463198	0.293025	0.454489	0.367794	0.41519	0.405835	0.324263	0.302476	0.329629	0.361548	0.354888	0.353213	0.276981	0.365182	0.312325
test21_cB_f3	0.627211	0.550788	0.574905	0.543024	0.565833	0.696824	0.610305	0.629359	0.495936	0.601876	0.510182	0.418124	0.531145	0.539231	1	0.427612	0.474669	0.377516	0.599972	0.59464	0.447156	0.448936	0.325243	0.3435	0.576479	0.428002	0.382473	0.288056	0.288863	0.374866	0.481037	0.420374	0.396814	0.323447	0.249941	0.433414	0.359612	0.374177	0.366987	0.36291	0.365494	0.31828
test31_cB_f3	0.611689	0.679451	0.541268	0.535052	0.679906	0.547815	0.477185	0.593962	0.618394	0.476729	0.580967	0.5247	0.412954	0.417506	0.427612	1	0.599885	0.452908	0.477927	0.357303	0.562701	0.570455	0.444941	0.343861	0.361156	0.428613	0.459253	0.489738	0.471597	0.302401	0.370479	0.257328	0.332758	0.406968	0.410056	0.427946	0.293623	0.382794	0.284645	0.349558	0.299051	0.318377
test14_cB_f4	0.551498	0.474957	0.49031	0.505785	0.616722	0.487378	0.534962	0.701618	0.434946	0.437309	0.529306	0.598729	0.377403	0.59283	0.474669	0.599885	1	0.508905	0.321431	0.417493	0.396973	0.651673	0.393969	0.500229	0.316785	0.378771	0.436271	0.548065	0.335303	0.432004	0.330901	0.384126	0.383683	0.472821	0.362558	0.367998	0.340277	0.421475	0.328605	0.408047	0.425428	0.364365
test19_cB_f4	0.521371	0.455547	0.597868	0.464624	0.59952	0.464448	0.503922	0.419311	0.510632	0.410725	0.692634	0.564106	0.445487	0.583549	0.377516	0.452908	0.508905	1	0.420098	0.410403	0.287227	0.395084	0.366815	0.652138	0.409919	0.395525	0.338133	0.563978	0.44303	0.429261	0.344128	0.497587	0.294442	0.381811	0.473674	0.404875	0.339221	0.450711	0.429549	0.341525	0.441186	0.390774
test33_cB_f4	0.530117	0.59611	0.613962	0.453142	0.490587	0.607031	0.497888	0.429519	0.534023	0.518771	0.562618	0.444429	0.43678	0.350027	0.599972	0.477927	0.321431	0.420098	1	0.376762	0.502237	0.386744	0.373192	0.306924	0.685497	0.500829	0.405232	0.351283	0.439569	0.352237	0.442208	0.389083	0.366657	0.360005	0.386846	0.52942	0.422483	0.458791	0.430057	0.41411	0.346585	0.38072
test37_cB_f4	0.52699	0.447078	0.468619	0.575253	0.479095	0.468145	0.51795	0.524694	0.508761	0.509314	0.416648	0.362206	0.800377	0.630107	0.59464	0.357303	0.417493	0.410403	0.376762	1	0.378284	0.406584	0.385775	0.529642	0.499335	0.392888	0.353486	0.341341	0.449369	0.464304	0.561243	0.510201	0.514623	0.400573	0.306993	0.40081	0.460254	0.358161	0.446833	0.347423	0.455952	0.401871
test40_cB_f4	0.505041	0.558804	0.44695	0.561607	0.445561	0.582501	0.384785	0.508966	0.501855	0.660374	0.390343	0.446207	0.438149	0.338912	0.447156	0.562701	0.396973	0.287227	0.502237	0.378284	1	0.379024	0.668002	0.298349	0.386227	0.497043	0.525774	0.329568	0.423343	0.461973	0.421663	0.300824	0.487763	0.360455	0.477377	0.386614	0.426478	0.338174	0.321579	0.410443	0.359638	0.375831
test05_cA_f6	0.400093	0.436708	0.350143	0.355366	0.448276	0.350386	0.50505	0.500428	0.405544	0.312562	0.384925	0.447522	0.362669	0.446268	0.448936	0.570455	0.651673	0.395084	0.386744	0.406584	0.379024	1	0.402688	0.403002	0.400279	0.403492	0.584723	0.561983	0.457951	0.362681	0.452013	0.404471	0.516139	0.660117	0.397185	0.493297	0.455712	0.56141	0.459473	0.561478	0.456729	0.500849
test22_cA_f6	0.373539	0.423958	0.320817	0.433694	0.331813	0.415313	0.36238	0.374268	0.471249	0.4886	0.289485	0.431359	0.444896	0.405208	0.325243	0.444941	0.393969	0.366815	0.373192	0.385775	0.668002	0.402688	1	0.40514	0.378804	0.417868	0.565781	0.434335	0.464679	0.601105	0.442262	0.405964	0.662324	0.407873	0.648296	0.392124	0.580166	0.452372	0.445531	0.458113	0.49094	0.514826
test27_cA_f6	0.385017	0.333613	0.440462	0.447005	0.438757	0.343268	0.376577	0.389356	0.376993	0.403432	0.498956	0.437572	0.447525	0.556278	0.3435	0.343861	0.500229	0.652138	0.306924	0.529642	0.298349	0.403002	0.40514	1	0.419827	0.415944	0.370174	0.584307	0.483036	0.602863	0.460493	0.675248	0.42786	0.549267	0.534932	0.426872	0.497302	0.486383	0.600607	0.490307	0.61076	0.555694
test35_cA_f6	0.391477	0.430615	0.463442	0.330815	0.369672	0.447205	0.384671	0.399666	0.485227	0.385344	0.425418	0.340262	0.440767	0.442132	0.576479	0.361156	0.316785	0.409919	0.685497	0.499335	0.386227	0.400279	0.378804	0.419827	1	0.424963	0.355378	0.465419	0.472275	0.480805	0.592443	0.522176	0.512105	0.407639	0.430028	0.700445	0.59539	0.612492	0.594037	0.473195	0.485203	0.536946
test42_cA_f6	0.353777	0.32286	0.412453	0.403958	0.418779	0.417619	0.341207	0.369432	0.302295	0.483924	0.46727	0.39437	0.43587	0.261736	0.428002	0.428613	0.378771	0.395525	0.500829	0.392888	0.497043	0.403492	0.417868	0.415944	0.424963	1	0.604535	0.375326	0.603892	0.482454	0.50103	0.555153	0.438861	0.528355	0.550259	0.553587	0.497007	0.509062	0.507217	0.610904	0.62904	0.56455
test09_cA_f7	0.315665	0.343264	0.278745	0.348125	0.361159	0.35645	0.395446	0.320113	0.316402	0.41074	0.326377	0.358127	0.392646	0.292513	0.382473	0.459253	0.436271	0.338133	0.405232	0.353486	0.525774	0.584723	0.565781	0.370174	0.355378	0.604535	1	0.41322	0.522077	0.445453	0.547878	0.500472	0.617707	0.59345	0.588866	0.469889	0.538057	0.547472	0.546429	0.677529	0.576137	0.611598
test10_cA_f7	0.316943	0.367684	0.372399	0.276619	0.371117	0.280309	0.310259	0.405877	0.43228	0.254461	0.430137	0.486896	0.286899	0.463198	0.288056	0.489738	0.548065	0.563978	0.351283	0.341341	0.329568	0.561983	0.434335	0.584307	0.465419	0.375326	0.41322	1	0.542018	0.522533	0.417128	0.486753	0.458523	0.609382	0.606606	0.589413	0.538957	0.680908	0.548085	0.544571	0.552879	0.607476
test12_cA_f7	0.304424	0.347544	0.352272	0.341436	0.354889	0.279151	0.295805	0.300936	0.407571	0.324514	0.406705	0.352837	0.485745	0.293025	0.288863	0.471597	0.335303	0.44303	0.439569	0.449369	0.423343	0.457951	0.464679	0.483036	0.472275	0.603892	0.522077	0.542018	1	0.447049	0.552804	0.506041	0.498633	0.620157	0.62625	0.609297	0.569892	0.569859	0.567645	0.557209	0.578927	0.639206
test30_cA_f7	0.310438	0.276382	0.356861	0.368835	0.285502	0.358291	0.303992	0.414566	0.321109	0.430978	0.331264	0.461707	0.399892	0.454489	0.374866	0.302401	0.432004	0.429261	0.352237	0.464304	0.461973	0.362681	0.601105	0.602863	0.480805	0.482454	0.445453	0.522533	0.447049	1	0.436361	0.60727	0.619543	0.495598	0.621272	0.485144	0.715548	0.554195	0.567103	0.561721	0.706695	0.639654
test41_cA_f7	0.305834	0.339476	0.287928	0.343617	0.360907	0.362149	0.307631	0.30541	0.388327	0.411703	0.337989	0.211578	0.496243	0.367794	0.481037	0.370479	0.330901	0.344128	0.442208	0.561243	0.421663	0.452013	0.442262	0.460493	0.592443	0.50103	0.547878	0.417128	0.552804	0.436361	1	0.626788	0.607543	0.484001	0.501316	0.631268	0.561693	0.577206	0.703113	0.562597	0.569903	0.634248
test06_cA_f8	0.268378	0.238884	0.316797	0.312843	0.323338	0.314491	0.341558	0.282379	0.278769	0.374185	0.373037	0.316657	0.436702	0.41519	0.420374	0.257328	0.384126	0.497587	0.389083	0.510201	0.300824	0.404471	0.405964	0.675248	0.522176	0.555153	0.500472	0.486753	0.506041	0.60727	0.626788	1	0.554295	0.559373	0.572979	0.5663	0.632264	0.64021	0.820822	0.641251	0.804877	0.719015
test08_cA_f8	0.270498	0.305573	0.240898	0.311649	0.246506	0.306966	0.352858	0.347623	0.347988	0.361747	0.220122	0.330586	0.449623	0.405835	0.396814	0.332758	0.383683	0.294442	0.366657	0.514623	0.487763	0.516139	0.662324	0.42786	0.512105	0.438861	0.617707	0.458523	0.498633	0.619543	0.607543	0.554295	1	0.547124	0.546482	0.522764	0.804924	0.600844	0.616877	0.610194	0.645552	0.69697
test13_cA_f8	0.267803	0.300651	0.302947	0.312898	0.308239	0.234836	0.346798	0.344703	0.279634	0.281375	0.346674	0.404851	0.341748	0.324263	0.323447	0.406968	0.472821	0.381811	0.360005	0.400573	0.360455	0.660117	0.407873	0.549267	0.407639	0.528355	0.59345	0.609382	0.620157	0.495598	0.484001	0.559373	0.547124	1	0.547026	0.534007	0.621295	0.621628	0.63216	0.783305	0.642317	0.70951
test25_cA_f8	0.247625	0.293318	0.298025	0.289326	0.293712	0.299445	0.240986	0.25803	0.347298	0.362335	0.355023	0.388387	0.331131	0.302476	0.249941	0.410056	0.362558	0.473674	0.386846	0.306993	0.477377	0.397185	0.648296	0.534932	0.430028	0.550259	0.588866	0.606606	0.62625	0.621272	0.501316	0.572979	0.546482	0.547026	1	0.56614	0.634121	0.650074	0.644304	0.637559	0.667427	0.732917
test38_cA_f8	0.280919	0.315606	0.337827	0.243284	0.335269	0.336479	0.27015	0.35401	0.369738	0.298427	0.392329	0.314603	0.354639	0.329629	0.433414	0.427946	0.367998	0.404875	0.52942	0.40081	0.386614	0.493297	0.392124	0.426872	0.700445	0.553587	0.469889	0.589413	0.609297	0.485144	0.631268	0.5663	0.522764	0.534007	0.56614	1	0.611525	0.805474	0.640457	0.61768	0.625991	0.697597
test04_cA_f9	0.231638	0.26424	0.267751	0.266929	0.217139	0.267151	0.298346	0.308064	0.307724	0.318627	0.259534	0.358911	0.397863	0.361548	0.359612	0.293623	0.340277	0.339221	0.422483	0.460254	0.426478	0.455712	0.580166	0.497302	0.59539	0.497007	0.538057	0.538957	0.569892	0.715548	0.561693	0.632264	0.804924	0.621295	0.634121	0.611525	1	0.702235	0.715743	0.707599	0.73953	0.821935
test23_cA_f9	0.236507	0.277271	0.285738	0.201982	0.296528	0.281539	0.298323	0.305853	0.316215	0.256985	0.349164	0.370554	0.309055	0.354888	0.374177	0.382794	0.421475	0.450711	0.458791	0.358161	0.338174	0.56141	0.452372	0.486383	0.612492	0.509062	0.547472	0.680908	0.569859	0.554195	0.577206	0.64021	0.600844	0.621628	0.650074	0.805474	0.702235	1	0.734134	0.716914	0.721689	0.812368
test26_cA_f9	0.220413	0.251863	0.272244	0.256249	0.270061	0.263358	0.289689	0.230395	0.293963	0.316246	0.324829	0.274272	0.381941	0.353213	0.366987	0.284645	0.328605	0.429549	0.430057	0.446833	0.321579	0.459473	0.445531	0.600607	0.594037	0.507217	0.546429	0.548085	0.567645	0.567103	0.703113	0.820822	0.616877	0.63216	0.644304	0.640457	0.715743	0.734134	1	0.733568	0.740237	0.831713
test32_cA_f9	0.218384	0.2484	0.254282	0.255005	0.265157	0.260801	0.280413	0.295356	0.233127	0.315054	0.304903	0.340877	0.292938	0.276981	0.36291	0.349558	0.408047	0.341525	0.41411	0.347423	0.410443	0.561478	0.458113	0.490307	0.473195	0.610904	0.677529	0.544571	0.557209	0.561721	0.562597	0.641251	0.610194	0.783305	0.637559	0.61768	0.707599	0.716914	0.733568	1	0.737003	0.830484
test39_cA_f9	0.229837	0.205482	0.277419	0.272865	0.277426	0.26881	0.289886	0.31702	0.251498	0.329194	0.321575	0.356285	0.39282	0.365182	0.365494	0.299051	0.425428	0.441186	0.346585	0.455952	0.359638	0.456729	0.49094	0.61076	0.485203	0.62904	0.576137	0.552879	0.578927	0.706695	0.569903	0.804877	0.645552	0.642317	0.667427	0.625991	0.73953	0.721689	0.740237	0.737003	1	0.84364
test01_protA	0.185133	0.218255	0.226127	0.223199	0.231582	0.224862	0.24058	0.255207	0.260893	0.28022	0.280878	0.305513	0.344328	0.312325	0.31828	0.318377	0.364365	0.390774	0.38072	0.401871	0.375831	0.500849	0.514826	0.555694	0.536946	0.56455	0.611598	0.607476	0.639206	0.639654	0.634248	0.719015	0.69697	0.70951	0.732917	0.697597	0.821935	0.812368	0.831713	0.830484	0.84364	1

## Sheet: CA1_MeanCorMatrix_test_set
item	test02_protB	test03_cB_f1	test24_cB_f1	test28_cB_f1	test34_cB_f1	test36_cB_f1	test07_cB_f2	test11_cB_f2	test15_cB_f2	test20_cB_f2	test29_cB_f2	test16_cB_f3	test17_cB_f3	test18_cB_f3	test21_cB_f3	test31_cB_f3	test14_cB_f4	test19_cB_f4	test33_cB_f4	test37_cB_f4	test40_cB_f4	test05_cA_f6	test22_cA_f6	test27_cA_f6	test35_cA_f6	test42_cA_f6	test09_cA_f7	test10_cA_f7	test12_cA_f7	test30_cA_f7	test41_cA_f7	test06_cA_f8	test08_cA_f8	test13_cA_f8	test25_cA_f8	test38_cA_f8	test04_cA_f9	test23_cA_f9	test26_cA_f9	test32_cA_f9	test39_cA_f9	test01_protA
test02_protB	1	0.833213	0.877287	0.849916	0.82853	0.865061	0.77841	0.790986	0.765271	0.75032	0.719159	0.723716	0.666955	0.715113	0.704771	0.649951	0.559576	0.591432	0.601828	0.605759	0.592289	0.429742	0.424031	0.401098	0.415695	0.475001	0.358934	0.32276	0.356016	0.375986	0.374942	0.317781	0.342903	0.29489	0.28073	0.295048	0.286806	0.260622	0.28302	0.255348	0.268546	0.228281
test03_cB_f1	0.833213	1	0.779673	0.752756	0.729378	0.782857	0.702057	0.711955	0.83603	0.695363	0.642634	0.669984	0.591744	0.67563	0.644772	0.691208	0.520645	0.547713	0.640719	0.557712	0.643469	0.45994	0.463268	0.392854	0.446212	0.428638	0.383761	0.371958	0.381087	0.372213	0.404102	0.314781	0.363851	0.338587	0.328652	0.319785	0.324387	0.294199	0.321808	0.30058	0.2612	0.264065
test24_cB_f1	0.877287	0.779673	1	0.785496	0.78168	0.804314	0.725177	0.720772	0.757631	0.707631	0.795376	0.752248	0.633959	0.665496	0.659045	0.637889	0.519808	0.622571	0.672705	0.593576	0.590832	0.411574	0.428074	0.439887	0.490166	0.518963	0.351906	0.374079	0.411705	0.415438	0.392031	0.361228	0.349964	0.325533	0.334952	0.360231	0.333035	0.326202	0.334039	0.3001	0.314519	0.281263
test28_cB_f1	0.849916	0.752756	0.785496	1	0.768306	0.778766	0.715763	0.731781	0.717062	0.809382	0.685016	0.68834	0.724754	0.701892	0.647057	0.620247	0.568623	0.572353	0.547408	0.665355	0.663984	0.457506	0.497739	0.480863	0.416544	0.510454	0.425114	0.361621	0.409678	0.454082	0.430815	0.380537	0.408432	0.355246	0.349743	0.298429	0.354602	0.283255	0.342429	0.320893	0.335525	0.291817
test34_cB_f1	0.82853	0.729378	0.78168	0.768306	1	0.787572	0.688602	0.708386	0.69588	0.720816	0.844814	0.670482	0.620122	0.669056	0.660061	0.707882	0.642947	0.655137	0.576035	0.578602	0.589496	0.48657	0.416396	0.47295	0.421078	0.54096	0.421088	0.385659	0.410725	0.396055	0.437083	0.383562	0.347522	0.347611	0.346936	0.351216	0.297071	0.330951	0.352281	0.332579	0.331279	0.293573
test36_cB_f1	0.865061	0.782857	0.804314	0.778766	0.787572	1	0.711949	0.716694	0.709534	0.821281	0.69809	0.670058	0.616365	0.667481	0.742742	0.619255	0.551096	0.566622	0.64493	0.560661	0.630693	0.419725	0.468448	0.39983	0.449054	0.519892	0.395843	0.322749	0.346124	0.426106	0.419402	0.351911	0.378583	0.287697	0.327754	0.333187	0.325867	0.306037	0.325259	0.298588	0.304997	0.265132
test07_cB_f2	0.77841	0.702057	0.725177	0.715763	0.688602	0.711949	1	0.67226	0.65501	0.642831	0.620122	0.70739	0.682515	0.69826	0.667333	0.556122	0.555356	0.587521	0.566998	0.613243	0.515953	0.502172	0.429646	0.419167	0.403787	0.457118	0.427958	0.333236	0.369654	0.369421	0.382491	0.37939	0.403375	0.362105	0.292754	0.305573	0.336502	0.322263	0.339184	0.305556	0.327679	0.284223
test11_cB_f2	0.790986	0.711955	0.720772	0.731781	0.708386	0.716694	0.67226	1	0.684992	0.674492	0.646232	0.712494	0.620605	0.736537	0.678747	0.634199	0.658482	0.542509	0.506915	0.632603	0.59985	0.48494	0.46039	0.451645	0.437748	0.480884	0.386084	0.412828	0.385308	0.465567	0.390226	0.359061	0.422382	0.381543	0.333016	0.366176	0.376722	0.323556	0.315172	0.337401	0.349175	0.30091
test15_cB_f2	0.765271	0.83603	0.757631	0.717062	0.69588	0.709534	0.65501	0.684992	1	0.665631	0.643043	0.657566	0.667791	0.702655	0.605835	0.669831	0.510564	0.587003	0.627813	0.620075	0.63336	0.449114	0.529269	0.466325	0.550617	0.450246	0.385096	0.449841	0.472659	0.447947	0.462451	0.380595	0.43332	0.380665	0.395823	0.397562	0.401888	0.3637	0.394769	0.330852	0.335799	0.338473
test20_cB_f2	0.75032	0.695363	0.707631	0.809382	0.720816	0.821281	0.642831	0.674492	0.665631	1	0.671416	0.656634	0.693334	0.668297	0.680334	0.610256	0.546122	0.571595	0.59233	0.629722	0.748407	0.437925	0.56743	0.488906	0.46547	0.580937	0.484043	0.375755	0.418322	0.5242	0.476645	0.429808	0.458396	0.366375	0.418832	0.362617	0.40446	0.328677	0.39246	0.368072	0.390709	0.337926
test29_cB_f2	0.719159	0.642634	0.795376	0.685016	0.844814	0.69809	0.620122	0.646232	0.643043	0.671416	1	0.682344	0.595961	0.621504	0.614665	0.668428	0.589892	0.706725	0.617904	0.571115	0.561367	0.46031	0.407442	0.536502	0.50084	0.611349	0.422915	0.447557	0.47006	0.457257	0.449352	0.448561	0.357938	0.407718	0.421919	0.428222	0.357302	0.397915	0.420167	0.395448	0.398185	0.362339
test16_cB_f3	0.723716	0.669984	0.752248	0.68834	0.670482	0.670058	0.70739	0.712494	0.657566	0.656634	0.682344	1	0.606089	0.672183	0.58477	0.612572	0.578008	0.652059	0.564715	0.557409	0.5934	0.467447	0.513337	0.477257	0.432137	0.524055	0.426037	0.465246	0.447969	0.502369	0.360596	0.396575	0.435944	0.406842	0.427811	0.365411	0.407609	0.370302	0.365488	0.364247	0.393238	0.341033
test17_cB_f3	0.666955	0.591744	0.633959	0.724754	0.620122	0.616365	0.682515	0.620605	0.667791	0.693334	0.595961	0.606089	1	0.650522	0.622223	0.542569	0.470569	0.586246	0.535482	0.793111	0.599307	0.472359	0.555514	0.511825	0.527131	0.554376	0.490773	0.423916	0.550315	0.503291	0.528789	0.472738	0.527261	0.441989	0.399835	0.412845	0.464054	0.389803	0.444154	0.380799	0.439388	0.397225
test18_cB_f3	0.715113	0.67563	0.665496	0.701892	0.669056	0.667481	0.69826	0.736537	0.702655	0.668297	0.621504	0.672183	0.650522	1	0.648395	0.549673	0.643878	0.655907	0.475866	0.693152	0.539423	0.505088	0.503875	0.582342	0.488085	0.425689	0.410239	0.494469	0.405095	0.523782	0.453376	0.470915	0.485915	0.422663	0.409401	0.368806	0.426608	0.381742	0.431256	0.370356	0.410843	0.363143
test21_cB_f3	0.704771	0.644772	0.659045	0.647057	0.660061	0.742742	0.667333	0.678747	0.605835	0.680334	0.614665	0.58477	0.622223	0.648395	1	0.54438	0.558112	0.527921	0.645641	0.665898	0.553274	0.499523	0.429497	0.435471	0.550031	0.558856	0.44961	0.370529	0.386024	0.455184	0.519845	0.483229	0.478406	0.382175	0.328286	0.445621	0.4134	0.399954	0.425825	0.395007	0.412179	0.356257
test31_cB_f3	0.649951	0.691208	0.637889	0.620247	0.707882	0.619255	0.556122	0.634199	0.669831	0.610256	0.668428	0.612572	0.542569	0.549673	0.54438	1	0.602776	0.550644	0.543221	0.544017	0.672463	0.560498	0.518261	0.449873	0.456872	0.553116	0.5072	0.499263	0.541552	0.451193	0.488368	0.382557	0.447672	0.469121	0.472676	0.469346	0.411247	0.42551	0.415958	0.430657	0.400156	0.402646
test14_cB_f4	0.559576	0.520645	0.519808	0.568623	0.642947	0.551096	0.555356	0.658482	0.510564	0.546122	0.589892	0.578008	0.470569	0.643878	0.558112	0.602776	1	0.58239	0.419261	0.52787	0.520293	0.694342	0.51839	0.584079	0.392433	0.528956	0.538765	0.582442	0.447665	0.535681	0.478248	0.493467	0.499588	0.574156	0.496025	0.458304	0.458118	0.488612	0.46232	0.523331	0.513857	0.466364
test19_cB_f4	0.591432	0.547713	0.622571	0.572353	0.655137	0.566622	0.587521	0.542509	0.587003	0.571595	0.706725	0.652059	0.586246	0.655907	0.527921	0.550644	0.58239	1	0.510417	0.558136	0.501656	0.488245	0.480556	0.655758	0.484164	0.529965	0.467347	0.580681	0.538471	0.54297	0.477495	0.556497	0.440731	0.483675	0.537071	0.46448	0.449928	0.496963	0.51182	0.41739	0.495776	0.46179
test33_cB_f4	0.601828	0.640719	0.672705	0.547408	0.576035	0.64493	0.566998	0.506915	0.627813	0.59233	0.617904	0.564715	0.535482	0.475866	0.645641	0.543221	0.419261	0.510417	1	0.513412	0.557554	0.427297	0.446976	0.391939	0.675012	0.565656	0.421935	0.394211	0.461991	0.424257	0.483727	0.436599	0.425914	0.405762	0.383206	0.495837	0.443659	0.451611	0.455476	0.414723	0.370874	0.397246
test37_cB_f4	0.605759	0.557712	0.593576	0.665355	0.578602	0.560661	0.613243	0.632603	0.620075	0.629722	0.571115	0.557409	0.793111	0.693152	0.665898	0.544017	0.52787	0.558136	0.513412	1	0.555139	0.505016	0.494268	0.591078	0.5879	0.536712	0.473629	0.463834	0.522387	0.535001	0.600316	0.551512	0.562549	0.492245	0.410414	0.459166	0.499214	0.423341	0.503265	0.434776	0.480378	0.44398
test40_cB_f4	0.592289	0.643469	0.590832	0.663984	0.589496	0.630693	0.515953	0.59985	0.63336	0.748407	0.561367	0.5934	0.599307	0.539423	0.553274	0.672463	0.520293	0.501656	0.557554	0.555139	1	0.481806	0.683163	0.448476	0.481072	0.555122	0.576784	0.447546	0.49571	0.54249	0.526112	0.419792	0.550402	0.449053	0.524519	0.439878	0.508739	0.407896	0.452122	0.468746	0.446687	0.444072
test05_cA_f6	0.429742	0.45994	0.411574	0.457506	0.48657	0.419725	0.502172	0.48494	0.449114	0.437925	0.46031	0.467447	0.472359	0.505088	0.499523	0.560498	0.694342	0.488245	0.427297	0.505016	0.481806	1	0.545936	0.576185	0.488247	0.528993	0.682518	0.648762	0.571951	0.518096	0.573805	0.571607	0.609411	0.741261	0.576078	0.583292	0.57053	0.642885	0.595828	0.679083	0.606764	0.634893
test22_cA_f6	0.424031	0.463268	0.428074	0.497739	0.416396	0.468448	0.429646	0.46039	0.529269	0.56743	0.407442	0.513337	0.555514	0.503875	0.429497	0.518261	0.51839	0.480556	0.446976	0.494268	0.683163	0.545936	1	0.522332	0.504469	0.502725	0.672757	0.583559	0.571232	0.673704	0.543155	0.515442	0.735053	0.562634	0.693561	0.520293	0.668883	0.558167	0.576843	0.567674	0.588724	0.599251
test27_cA_f6	0.401098	0.392854	0.439887	0.480863	0.47295	0.39983	0.419167	0.451645	0.466325	0.488906	0.536502	0.477257	0.511825	0.582342	0.435471	0.449873	0.584079	0.655758	0.391939	0.591078	0.448476	0.576185	0.522332	1	0.507644	0.514779	0.539017	0.701042	0.579046	0.679707	0.569523	0.742246	0.54747	0.674852	0.661523	0.535444	0.588128	0.602663	0.684543	0.619189	0.65897	0.653223
test35_cA_f6	0.415695	0.446212	0.490166	0.416544	0.421078	0.449054	0.403787	0.437748	0.550617	0.46547	0.50084	0.432137	0.527131	0.488085	0.550031	0.456872	0.392433	0.484164	0.675012	0.5879	0.481072	0.488247	0.504469	0.507644	1	0.523127	0.465595	0.52574	0.590996	0.560139	0.643908	0.596093	0.571632	0.527601	0.53507	0.706812	0.618912	0.644009	0.64531	0.535828	0.553587	0.59896
test42_cA_f6	0.475001	0.428638	0.518963	0.510454	0.54096	0.519892	0.457118	0.480884	0.450246	0.580937	0.611349	0.524055	0.554376	0.425689	0.558856	0.553116	0.528956	0.529965	0.565656	0.536712	0.555122	0.528993	0.502725	0.514779	0.523127	1	0.635947	0.465368	0.618125	0.551396	0.574272	0.590704	0.526747	0.542802	0.539411	0.578905	0.529091	0.52924	0.534768	0.587141	0.603993	0.543722
test09_cA_f7	0.358934	0.383761	0.351906	0.425114	0.421088	0.395843	0.427958	0.386084	0.385096	0.484043	0.422915	0.426037	0.490773	0.410239	0.44961	0.5072	0.538765	0.467347	0.421935	0.473629	0.576784	0.682518	0.672757	0.539017	0.465595	0.635947	1	0.564241	0.601115	0.59493	0.65661	0.629584	0.724227	0.685418	0.677002	0.582886	0.659824	0.644233	0.66278	0.73396	0.697208	0.695243
test10_cA_f7	0.32276	0.371958	0.374079	0.361621	0.385659	0.322749	0.333236	0.412828	0.449841	0.375755	0.447557	0.465246	0.423916	0.494469	0.370529	0.499263	0.582442	0.580681	0.394211	0.463834	0.447546	0.648762	0.583559	0.701042	0.52574	0.465368	0.564241	1	0.641241	0.7025	0.561167	0.617073	0.620602	0.728399	0.747914	0.675723	0.700919	0.749328	0.696535	0.698067	0.689467	0.756139
test12_cA_f7	0.356016	0.381087	0.411705	0.409678	0.410725	0.346124	0.369654	0.385308	0.472659	0.418322	0.47006	0.447969	0.550315	0.405095	0.386024	0.541552	0.447665	0.538471	0.461991	0.522387	0.49571	0.571951	0.571232	0.579046	0.590996	0.618125	0.601115	0.641241	1	0.574594	0.6165	0.584987	0.596863	0.688418	0.695482	0.692279	0.651049	0.653627	0.658971	0.623551	0.657789	0.699587
test30_cA_f7	0.375986	0.372213	0.415438	0.454082	0.396055	0.426106	0.369421	0.465567	0.447947	0.5242	0.457257	0.502369	0.503291	0.523782	0.455184	0.451193	0.535681	0.54297	0.424257	0.535001	0.54249	0.518096	0.673704	0.679707	0.560139	0.551396	0.59493	0.7025	0.574594	1	0.590706	0.664847	0.707623	0.621904	0.72684	0.638054	0.764007	0.65063	0.65461	0.658961	0.744694	0.696935
test41_cA_f7	0.374942	0.404102	0.392031	0.430815	0.437083	0.419402	0.382491	0.390226	0.462451	0.476645	0.449352	0.360596	0.528789	0.453376	0.519845	0.488368	0.478248	0.477495	0.483727	0.600316	0.526112	0.573805	0.543155	0.569523	0.643908	0.574272	0.65661	0.561167	0.6165	0.590706	1	0.68701	0.673411	0.60333	0.604193	0.700974	0.646913	0.656788	0.758798	0.667878	0.658047	0.696218
test06_cA_f8	0.317781	0.314781	0.361228	0.380537	0.383562	0.351911	0.37939	0.359061	0.380595	0.429808	0.448561	0.396575	0.472738	0.470915	0.483229	0.382557	0.493467	0.556497	0.436599	0.551512	0.419792	0.571607	0.515442	0.742246	0.596093	0.590704	0.629584	0.617073	0.584987	0.664847	0.68701	1	0.637971	0.676799	0.657068	0.660921	0.684161	0.714146	0.808508	0.720237	0.795474	0.757704
test08_cA_f8	0.342903	0.363851	0.349964	0.408432	0.347522	0.378583	0.403375	0.422382	0.43332	0.458396	0.357938	0.435944	0.527261	0.485915	0.478406	0.447672	0.499588	0.440731	0.425914	0.562549	0.550402	0.609411	0.735053	0.54747	0.571632	0.526747	0.724227	0.620602	0.596863	0.707623	0.673411	0.637971	1	0.661787	0.671731	0.633094	0.835256	0.68532	0.703553	0.692285	0.730965	0.73687
test13_cA_f8	0.29489	0.338587	0.325533	0.355246	0.347611	0.287697	0.362105	0.381543	0.380665	0.366375	0.407718	0.406842	0.441989	0.422663	0.382175	0.469121	0.574156	0.483675	0.405762	0.492245	0.449053	0.741261	0.562634	0.674852	0.527601	0.542802	0.685418	0.728399	0.688418	0.621904	0.60333	0.676799	0.661787	1	0.696919	0.655764	0.715193	0.720944	0.724154	0.822776	0.72336	0.789783
test25_cA_f8	0.28073	0.328652	0.334952	0.349743	0.346936	0.327754	0.292754	0.333016	0.395823	0.418832	0.421919	0.427811	0.399835	0.409401	0.328286	0.472676	0.496025	0.537071	0.383206	0.410414	0.524519	0.576078	0.693561	0.661523	0.53507	0.539411	0.677002	0.747914	0.695482	0.72684	0.604193	0.657068	0.671731	0.696919	1	0.673335	0.741989	0.73959	0.745657	0.73478	0.751283	0.802331
test38_cA_f8	0.295048	0.319785	0.360231	0.298429	0.351216	0.333187	0.305573	0.366176	0.397562	0.362617	0.428222	0.365411	0.412845	0.368806	0.445621	0.469346	0.458304	0.46448	0.495837	0.459166	0.439878	0.583292	0.520293	0.535444	0.706812	0.578905	0.582886	0.675723	0.692279	0.638054	0.700974	0.660921	0.633094	0.655764	0.673335	1	0.739742	0.839821	0.724528	0.718129	0.728095	0.783445
test04_cA_f9	0.286806	0.324387	0.333035	0.354602	0.297071	0.325867	0.336502	0.376722	0.401888	0.40446	0.357302	0.407609	0.464054	0.426608	0.4134	0.411247	0.458118	0.449928	0.443659	0.499214	0.508739	0.57053	0.668883	0.588128	0.618912	0.529091	0.659824	0.700919	0.651049	0.764007	0.646913	0.684161	0.835256	0.715193	0.741989	0.739742	1	0.782622	0.768006	0.76665	0.79605	0.847721
test23_cA_f9	0.260622	0.294199	0.326202	0.283255	0.330951	0.306037	0.322263	0.323556	0.3637	0.328677	0.397915	0.370302	0.389803	0.381742	0.399954	0.42551	0.488612	0.496963	0.451611	0.423341	0.407896	0.642885	0.558167	0.602663	0.644009	0.52924	0.644233	0.749328	0.653627	0.65063	0.656788	0.714146	0.68532	0.720944	0.73959	0.839821	0.782622	1	0.807086	0.771552	0.785827	0.885176
test26_cA_f9	0.28302	0.321808	0.334039	0.342429	0.352281	0.325259	0.339184	0.315172	0.394769	0.39246	0.420167	0.365488	0.444154	0.431256	0.425825	0.415958	0.46232	0.51182	0.455476	0.503265	0.452122	0.595828	0.576843	0.684543	0.64531	0.534768	0.66278	0.696535	0.658971	0.65461	0.758798	0.808508	0.703553	0.724154	0.745657	0.724528	0.768006	0.807086	1	0.784343	0.78579	0.86516
test32_cA_f9	0.255348	0.30058	0.3001	0.320893	0.332579	0.298588	0.305556	0.337401	0.330852	0.368072	0.395448	0.364247	0.380799	0.370356	0.395007	0.430657	0.523331	0.41739	0.414723	0.434776	0.468746	0.679083	0.567674	0.619189	0.535828	0.587141	0.73396	0.698067	0.623551	0.658961	0.667878	0.720237	0.692285	0.822776	0.73478	0.718129	0.76665	0.771552	0.784343	1	0.781535	0.855992
test39_cA_f9	0.268546	0.2612	0.314519	0.335525	0.331279	0.304997	0.327679	0.349175	0.335799	0.390709	0.398185	0.393238	0.439388	0.410843	0.412179	0.400156	0.513857	0.495776	0.370874	0.480378	0.446687	0.606764	0.588724	0.65897	0.553587	0.603993	0.697208	0.689467	0.657789	0.744694	0.658047	0.795474	0.730965	0.72336	0.751283	0.728095	0.79605	0.785827	0.78579	0.781535	1	0.852626
test01_protA	0.228281	0.264065	0.281263	0.291817	0.293573	0.265132	0.284223	0.30091	0.338473	0.337926	0.362339	0.341033	0.397225	0.363143	0.356257	0.402646	0.466364	0.46179	0.397246	0.44398	0.444072	0.634893	0.599251	0.653223	0.59896	0.543722	0.695243	0.756139	0.699587	0.696935	0.696218	0.757704	0.73687	0.789783	0.802331	0.783445	0.847721	0.885176	0.86516	0.855992	0.852626	1
